# Supplementary material for: Comparative Metagenomic and Metatranscriptomic Analysis of Hindgut Paunch Microbiota in Wood- and Dung-Feeding Higher Termites
Source: PubMed Central journal article supplement (PMC3625147; doi:10.1371/journal.pone.0061126), 2013-04-12
Supplement: pone.0061126.s003.pdf [file pone.0061126.s003.pdf]

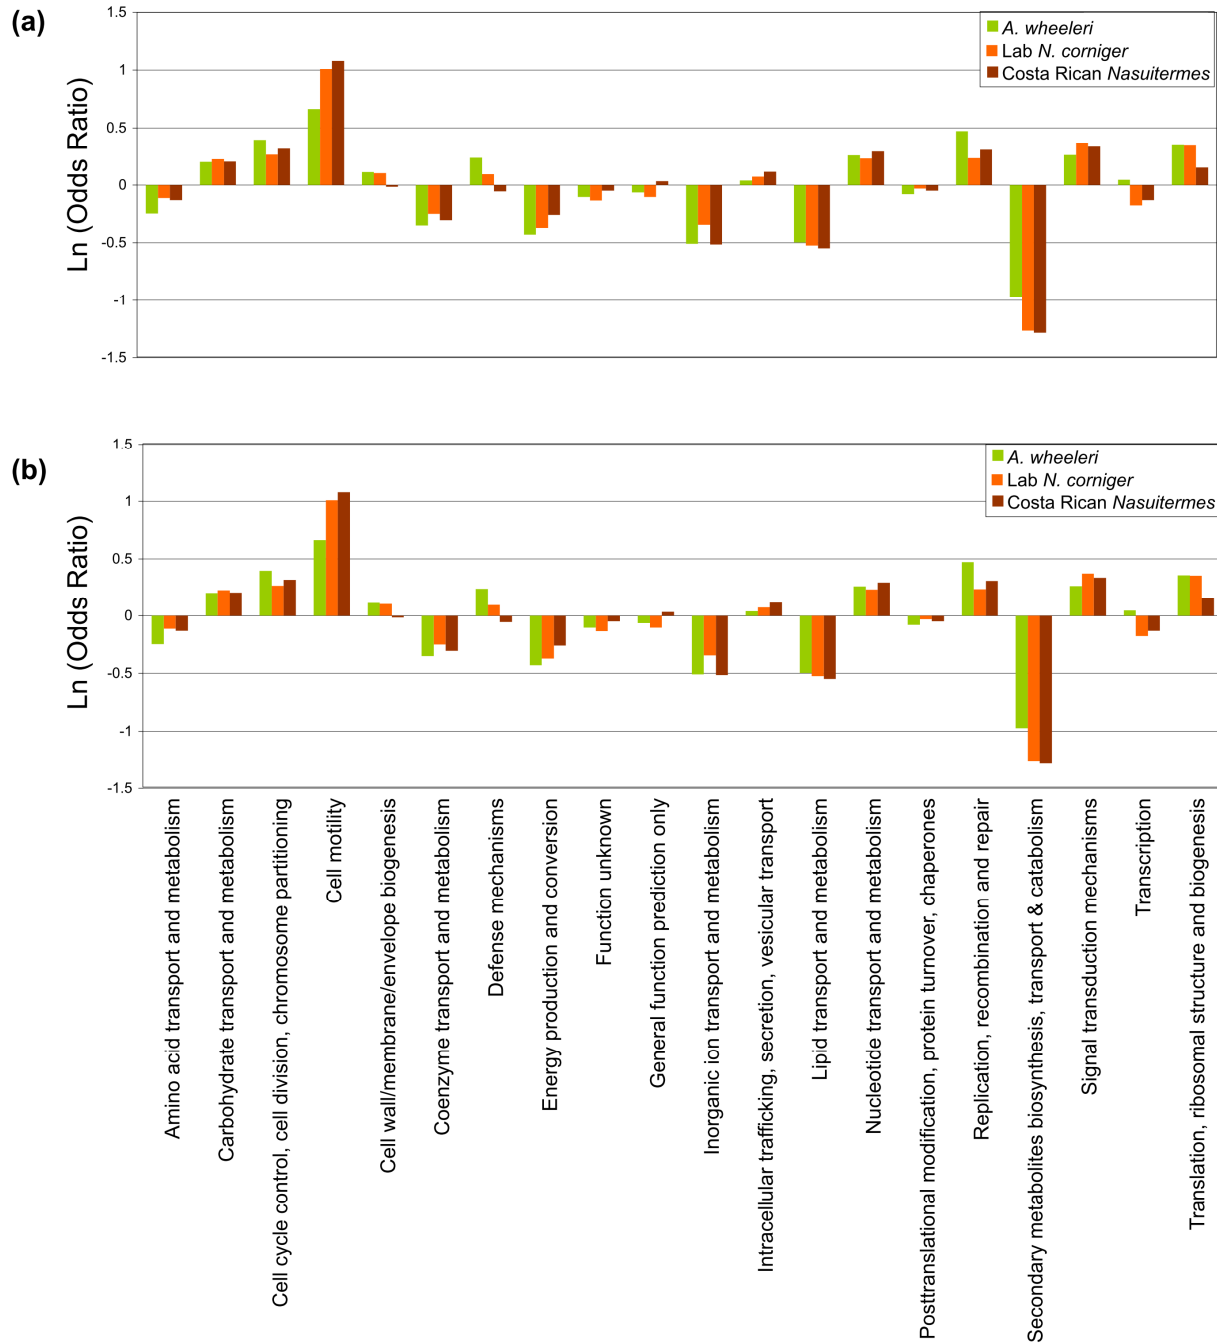

**Figure S3.** Natural logarithm of odds ratios of COG categories when comparing the three termite hindgut P3 metagenomes to the average of a total of 149 metagenomes not associated with termites **(a)** and to the average of all 2456 bacterial genomes **(b)** in the IMG/M database as publically available in March, 2011.
