# Supplementary material for: Comparative Metagenomic and Metatranscriptomic Analysis of Hindgut Paunch Microbiota in Wood- and Dung-Feeding Higher Termites
Source: PubMed Central journal article supplement (PMC3625147; doi:10.1371/journal.pone.0061126), 2013-04-12
Supplement: pone.0061126.s006.pdf [file pone.0061126.s006.pdf]

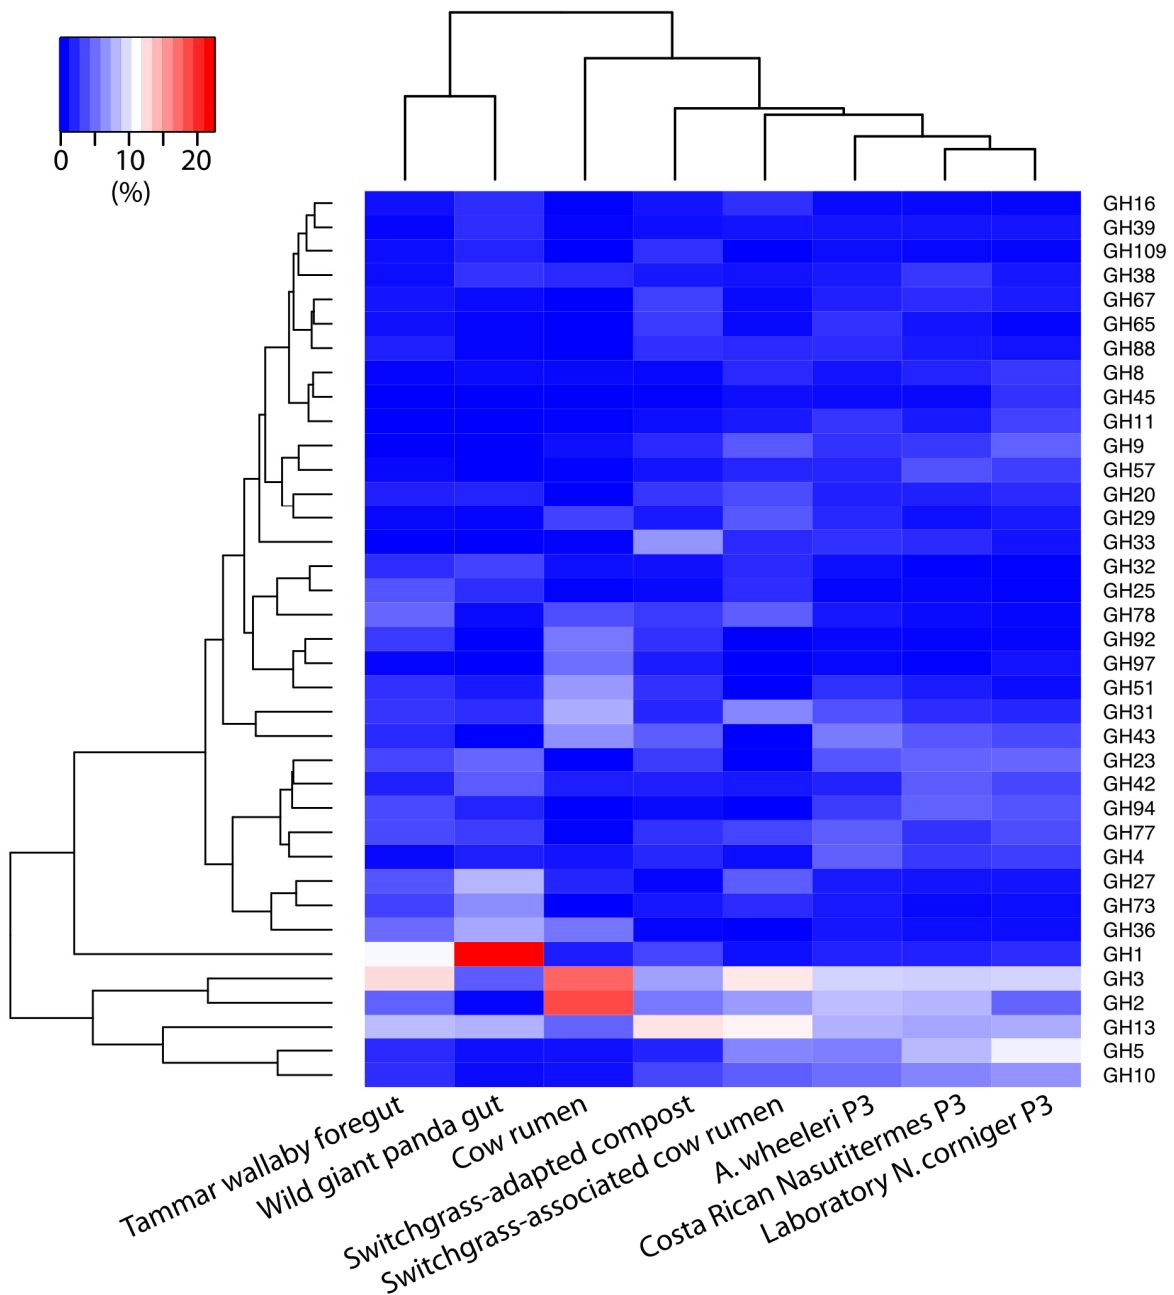

**Figure S6.** A cluster heatmap showing the clustering patterns of lignocellulose-degrading communities based on GH composition (the relative abundance of individual GHs in total GHs, based on gene counts). Only the GHs with the relative abundance  $\geq 2\%$  in any one of these microbiomes were shown in this heatmap.
