# Supplementary material for: Comparative Metagenomic and Metatranscriptomic Analysis of Hindgut Paunch Microbiota in Wood- and Dung-Feeding Higher Termites
Source: PubMed Central journal article supplement (PMC3625147; doi:10.1371/journal.pone.0061126), 2013-04-12
Supplement: pone.0061126.s007.pdf [file pone.0061126.s007.pdf]

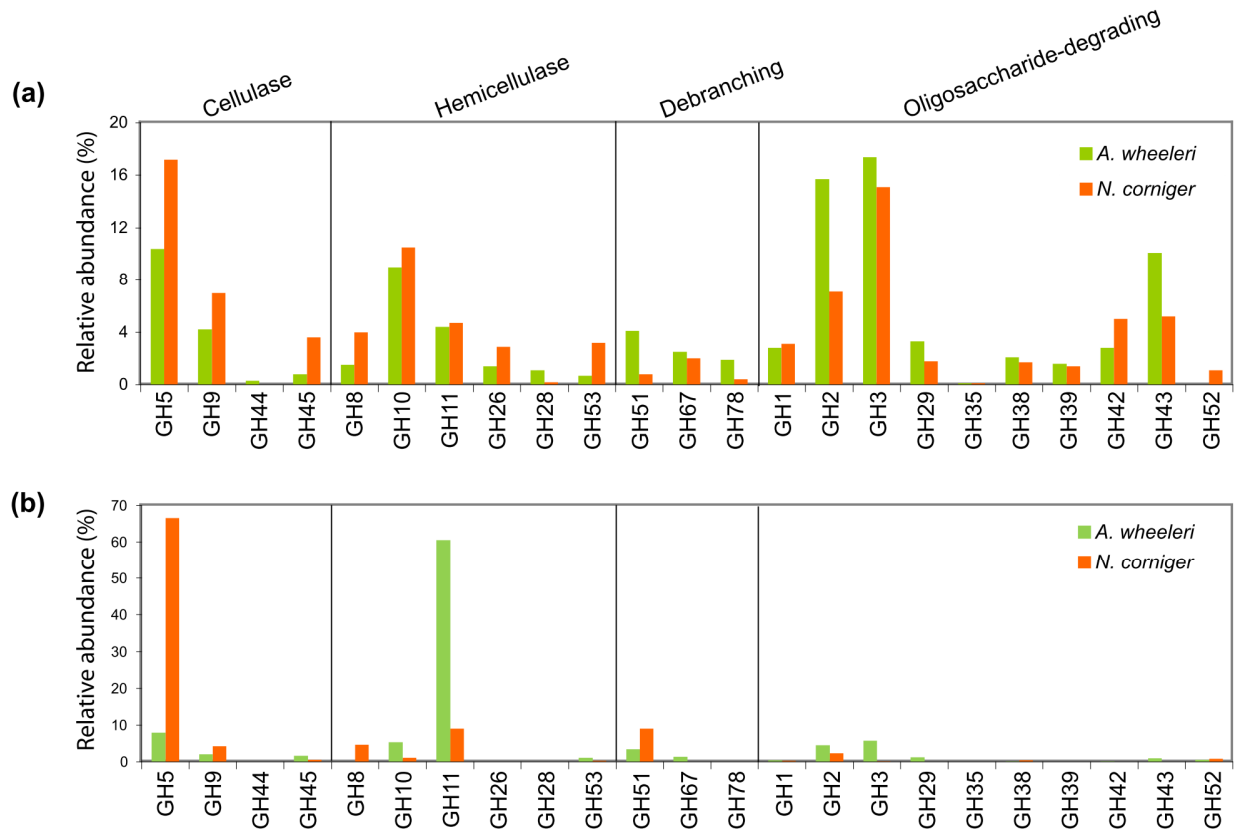

**Figure S7.** Relative abundance of each GH in the four categories of GHs listed above for metagenomes **(a)** and metatranscriptomes **(b)**.
