# Supplementary material for: Comparative Metagenomic and Metatranscriptomic Analysis of Hindgut Paunch Microbiota in Wood- and Dung-Feeding Higher Termites
Source: PubMed Central journal article supplement (PMC3625147; doi:10.1371/journal.pone.0061126), 2013-04-12
Supplement: pone.0061126.s008.pdf [file pone.0061126.s008.pdf]

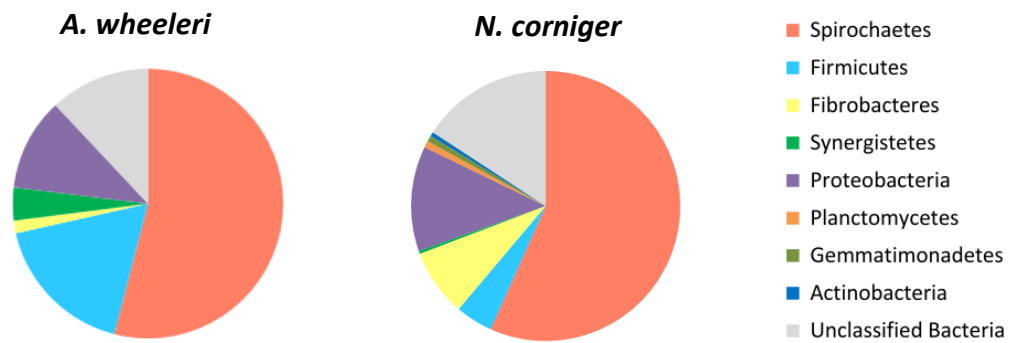

**Figure S8.** Taxonomic distribution of methyl-accepting chemotaxis protein (MCP) family by MEGAN using Blastp results against the NR database.
