# Supplementary material for: Comparative Metagenomic and Metatranscriptomic Analysis of Hindgut Paunch Microbiota in Wood- and Dung-Feeding Higher Termites
Source: PubMed Central journal article supplement (PMC3625147; doi:10.1371/journal.pone.0061126), 2013-04-12
Supplement: pone.0061126.s009.pdf [file pone.0061126.s009.pdf]

**Table S1. Metagenome sequencing, assembly and annotation summary**

| Metagenome                      | Sequencing          |                  |                                                  | Assembly                           |                              |                     |                                    |                     |                      |                     |                    | Annotation          |                             |                                      |                      |                       |
|---------------------------------|---------------------|------------------|--------------------------------------------------|------------------------------------|------------------------------|---------------------|------------------------------------|---------------------|----------------------|---------------------|--------------------|---------------------|-----------------------------|--------------------------------------|----------------------|-----------------------|
|                                 | No. of Sanger reads | No. of 454 reads | Total bases used for assembly after read QC (bp) | Total bases went into contigs (bp) | Total length of contigs (bp) | Count of all contig | Count of large contig <sup>a</sup> | N50 of large contig | Mean of large contig | Largest contig (bp) | Count of singleton | No. of coding bases | No. of protein coding genes | Percent with function prediction (%) | Percent with COG (%) | Percent with pfam (%) |
| <i>N. corniger</i> (Lab colony) | 8013                | 516,318          | 141,210,426                                      | 79,882,995                         | 27,355,775                   | 49,107              | 19,804                             | 983                 | 939                  | 9833                | 193,472            | 44,733,336          | 150,782                     | 48.2%                                | 38.3%                | 39.7%                 |
| <i>A. wheeleri</i> (Cow dung)   | 12272               | 570,328          | 256,183,883                                      | 147,719,803                        | 51,571,946                   | 96,519              | 45,961                             | 570                 | 684                  | 9229                | 213,123            | 100,984,684         | 321,461                     | 44.2%                                | 36.2%                | 37.7%                 |

<sup>a</sup>Large contig is contig longer than 500 bp.
