# Supplementary material for: Comparative Metagenomic and Metatranscriptomic Analysis of Hindgut Paunch Microbiota in Wood- and Dung-Feeding Higher Termites
Source: PubMed Central journal article supplement (PMC3625147; doi:10.1371/journal.pone.0061126), 2013-04-12
Supplement: pone.0061126.s010.pdf [file pone.0061126.s010.pdf]

**Table S2. Phylogenetic marker COGs used in phylogenetic distribution**

| <b>COG ID</b> | <b>Function Name</b>                                       | <b>Single Copy<sup>a</sup></b> |
|---------------|------------------------------------------------------------|--------------------------------|
| COG0051       | Ribosomal protein S10                                      | Yes                            |
| COG0211       | Ribosomal protein L27                                      | Yes                            |
| COG0089       | Ribosomal protein L23                                      | Yes                            |
| COG0222       | Ribosomal protein L7/L12                                   | Yes                            |
| COG0256       | Ribosomal protein L18                                      | Yes                            |
| COG0093       | Ribosomal protein L14                                      | Yes                            |
| COG0233       | Ribosome recycling factor                                  | Almost                         |
| COG0691       | tmRNA-binding protein                                      | Yes                            |
| COG0197       | Ribosomal protein L16/L10E                                 | Yes                            |
| COG0200       | Ribosomal protein L15                                      | Yes                            |
| COG0094       | Ribosomal protein L5                                       | Yes                            |
| COG0100       | Ribosomal protein S11                                      | Yes                            |
| COG0292       | Ribosomal protein L20                                      | Yes                            |
| COG0099       | Ribosomal protein S13                                      | Yes                            |
| COG0669       | Phosphopantetheine adenylyltransferase                     | Almost                         |
| COG0048       | Ribosomal protein S12                                      | Yes                            |
| COG0096       | Ribosomal protein S8                                       | Yes                            |
| COG0102       | Ribosomal protein L13                                      | Yes                            |
| COG0081       | Ribosomal protein L1                                       | Yes                            |
| COG0092       | Ribosomal protein S3                                       | Yes                            |
| COG0098       | Ribosomal protein S5                                       | Yes                            |
| COG0049       | Ribosomal protein S7                                       | Yes                            |
| COG0080       | Ribosomal protein L11                                      | Almost                         |
| COG0087       | Ribosomal protein L3                                       | Yes                            |
| COG0090       | Ribosomal protein L2                                       | Yes                            |
| COG0097       | Ribosomal protein L6P/L9E                                  | Yes                            |
| COG0088       | Ribosomal protein L4                                       | Yes                            |
| COG2255       | Holliday junction resolvasome, helicase subunit            | Almost                         |
| COG0150       | Phosphoribosylaminoimidazole (AIR) synthetase              | Yes                            |
| COG0541       | Signal recognition particle GTPase                         | Yes                            |
| COG0632       | Holliday junction resolvasome, DNA-binding subunit         | Yes                            |
| COG0504       | CTP synthase (UTP-ammonia lyase)                           | Yes                            |
| COG0216       | Protein chain release factor A                             | Yes                            |
| COG0173       | Aspartyl-tRNA synthetase                                   | Almost                         |
| COG0481       | Membrane GTPase LepA                                       | Almost                         |
| COG0016       | Phenylalanyl-tRNA synthetase alpha subunit                 | Yes                            |
| COG0556       | Helicase subunit of the DNA excision repair complex        | Yes                            |
| COG0533       | Metal-dependent proteases with possible chaperone activity | Almost                         |

<sup>a</sup> “Yes” means that genes belonging to this COG are single copy per genome. “Almost” means that genes belonging to this COG are single copy in most genomes.
