# Supplementary material for: Comparative Metagenomic and Metatranscriptomic Analysis of Hindgut Paunch Microbiota in Wood- and Dung-Feeding Higher Termites
Source: PubMed Central journal article supplement (PMC3625147; doi:10.1371/journal.pone.0061126), 2013-04-12
Supplement: pone.0061126.s011.pdf [file pone.0061126.s011.pdf]

**Table S3. Metatranscriptome sequencing, assembly, annotation and read mapping summary**

|                                                                                  |                                                      | <i>N. corniger</i> | <i>A. wheeleri</i> |
|----------------------------------------------------------------------------------|------------------------------------------------------|--------------------|--------------------|
|                                                                                  | Total bases in raw sequences generated (Mbp)         | 11,391             | 62,396             |
|                                                                                  | No. of raw reads                                     | 123,229,584        | 443,635,388        |
|                                                                                  | No. of reads after a fast rRNA filter                | 18,003,327         | 70,634,785         |
|                                                                                  | No. of reads after QC                                | 17,210,051         | 65,707,417         |
| <i>De novo</i> assembly of metatranscriptome <sup>a</sup>                        | No. of contigs                                       | 11,048             | 17,546             |
|                                                                                  | Min. contig length (bp)                              | 100                | 100                |
|                                                                                  | Max. contig length (bp)                              | 1,944              | 2,946              |
|                                                                                  | Average contig length (bp)                           | 217                | 226                |
|                                                                                  | Median contig length (bp)                            | 150                | 155                |
|                                                                                  | Total base in all contigs (bp)                       | 2,392,193          | 3,960,696          |
| Annotation of <i>De novo</i> assembled metatranscriptome                         | Total base in the annotated metatranscriptome (bp)   | 2,367,344          | 3,936,836          |
|                                                                                  | No. of coding bases (bp)                             | 1,568,780          | 3,011,488          |
|                                                                                  | No. of contigs in annotated metatranscriptome        | 10,830             | 17,366             |
|                                                                                  | No. of all predicted genes                           | 6,470              | 13,514             |
|                                                                                  | No. of rRNA genes                                    | 3,339              | 9,029              |
|                                                                                  | No. of protein-coding genes                          | 3,131              | 4,459              |
|                                                                                  | No. of protein-coding genes with function prediction | 1,438              | 1,581              |
|                                                                                  | No. of genes with COG                                | 1,229              | 1,160              |
|                                                                                  | No. of genes with pfam                               | 1,194              | 1,381              |
| Reads mapped to the co-assembly of metagenome and metatranscriptome <sup>b</sup> | No. of reads mapped to the co-assembly               | 5,047,055          | 4,798,261          |
|                                                                                  | No. of reads mapped to rRNA                          | 3,604,184          | 3,457,426          |
|                                                                                  | No. of reads mapped to non-rRNA                      | 1,442,871          | 1,340,835          |
|                                                                                  | No. of reads mapped to genes with COG                | 487,628            | 469,315            |
|                                                                                  | No. of reads mapped to genes with pfam               | 538,298            | 503,242            |

<sup>a</sup>Contigs shorter than 100 bp were excluded as they are not reliable for functional annotation.

<sup>b</sup>Before the co-assembly, the large number of rRNA genes obtained through the *de novo* metatranscriptome assembly were excluded to focus on the assembly of functional genes. The number of reads mapped to rRNA would otherwise be much higher than the listed, if these rRNA genes had been included.
