# Supplementary material for: Comparative Metagenomic and Metatranscriptomic Analysis of Hindgut Paunch Microbiota in Wood- and Dung-Feeding Higher Termites
Source: PubMed Central journal article supplement (PMC3625147; doi:10.1371/journal.pone.0061126), 2013-04-12
Supplement: pone.0061126.s012.pdf [file pone.0061126.s012.pdf]

**Table S4. Major functions differentially represented between *A. wheeleri* and *Nasutitermes* spp. metagenomes**

| Function ID                                                | Function description                                       | Estimated gene copies <sup>a</sup> |                      |                     | <i>A. wheeleri</i> vs. laboratory <i>N. corniger</i> |                |                          | <i>Amitermes</i> vs. Costa Rican <i>Nasutitermes</i> sp. |                |                          |
|------------------------------------------------------------|------------------------------------------------------------|------------------------------------|----------------------|---------------------|------------------------------------------------------|----------------|--------------------------|----------------------------------------------------------|----------------|--------------------------|
|                                                            |                                                            | Ami <sup>b</sup>                   | Lab Nas <sup>b</sup> | CR Nas <sup>b</sup> | Z-LOR <sup>c</sup>                                   | p-value        | Significant <sup>d</sup> | Z-LOR <sup>c</sup>                                       | p-value        | Significant <sup>d</sup> |
| <b>Glycoside hydrolases in plant cell wall degradation</b> |                                                            |                                    |                      |                     |                                                      |                |                          |                                                          |                |                          |
| pfam02449                                                  | Glyco_hydro_42: Oligosaccharide degrading                  | 41                                 | 57                   | 41                  | -4.6687                                              | 3E-06          | Yes                      | -5.02625                                                 | 5E-07          | Yes                      |
| pfam08532                                                  | Glyco_hydro_42M: Oligosaccharide degrading                 | 22                                 | 35                   | 29                  | -4.00926                                             | 6.1E-05        | Yes                      | -4.90337                                                 | 9.4E-07        | Yes                      |
| pfam00933                                                  | Glyco_hydro_3: Oligosaccharide degrading                   | 268                                | 205                  | 120                 | -3.86579                                             | 0.00011        | Yes                      | -2.79182                                                 | 0.00524        | Yes                      |
| pfam03512                                                  | Glyco_hydro_52: Oligosaccharide degrading                  | 0                                  | 22                   | 4                   | -3.6359                                              | 0.00028        | Yes                      | -2.23273                                                 | 0.02557        | No                       |
| pfam00232                                                  | Glyco_hydro_1: Oligosaccharide degrading                   | 70                                 | 62                   | 30                  | -2.89659                                             | 0.00377        | Yes                      | -1.2038                                                  | 0.22867        | No                       |
| pfam10566                                                  | Glyco_hydro_97: Oligosaccharide degrading                  | 7                                  | 14                   | 1                   | -2.85069                                             | 0.00436        | Yes                      | 0.78198                                                  | 0.43422        | No                       |
| pfam02837                                                  | Glyco_hydro_2_N: Oligosaccharide degrading                 | 142                                | 48                   | 70                  | 2.74517                                              | 0.00605        | Yes                      | -2.75784                                                 | 0.00582        | Yes                      |
| pfam01055                                                  | Glyco_hydro_31: Oligosaccharide degrading                  | 167                                | 52                   | 40                  | 3.40358                                              | 0.00067        | Yes                      | 1.81374                                                  | 0.06972        | No                       |
| pfam07745                                                  | Glyco_hydro_53: Hemicellulase                              | 17                                 | 64                   | 26                  | -7.15545                                             | 8.3E-13        | Yes                      | -4.92124                                                 | 8.6E-07        | Yes                      |
| pfam01270                                                  | Glyco_hydro_8: Hemicellulase                               | 37                                 | 80                   | 32                  | -7.03073                                             | 2.1E-12        | Yes                      | -3.99692                                                 | 6.4E-05        | Yes                      |
| pfam00331                                                  | Glyco_hydro_10: Hemicellulase                              | 225                                | 208                  | 119                 | -5.6994                                              | 1.2E-08        | Yes                      | -4.17515                                                 | 3E-05          | Yes                      |
| pfam02156                                                  | Glyco_hydro_26: Hemicellulase                              | 34                                 | 58                   | 24                  | -5.37367                                             | 7.7E-08        | Yes                      | -2.85709                                                 | 0.00428        | Yes                      |
| pfam00457                                                  | Glyco_hydro_11: Hemicellulase                              | 110                                | 94                   | 23                  | -3.3417                                              | 0.00083        | Yes                      | 1.9851                                                   | 0.04713        | No                       |
| pfam00150                                                  | Cellulase, GH5: Cellulase                                  | 258                                | 341                  | 167                 | -10.9823                                             | 4.6E-28        | Yes                      | -6.80117                                                 | 1E-11          | Yes                      |
| pfam02015                                                  | Glyco_hydro_45: Cellulase                                  | 20                                 | 71                   | 7                   | -7.48051                                             | 7.4E-14        | Yes                      | -0.13691                                                 | 0.8911         | No                       |
| pfam00759                                                  | Glyco_hydro_9: Cellulase                                   | 104                                | 138                  | 51                  | -7.00507                                             | 2.5E-12        | Yes                      | -2.32518                                                 | 0.02006        | No                       |
| pfam05592                                                  | Bac_rhamnosid: Debranching                                 | 48                                 | 8                    | 9                   | 3.05183                                              | 0.00227        | Yes                      | 1.55292                                                  | 0.12044        | No                       |
| COG3534                                                    | Alpha-L-arabinofuranosidase: Debranching                   | 217                                | 57                   | 42                  | 4.79881                                              | 1.6E-06        | Yes                      | 1.65457                                                  | 0.09801        | No                       |
| <b>Cohesin and dockerin</b>                                |                                                            |                                    |                      |                     |                                                      |                |                          |                                                          |                |                          |
| pfam09603                                                  | Fib_succ_major, corresponding to TIGR02145                 | 255                                | 2420                 | 687                 | -43.9205                                             | 0              | Yes                      | -28.7156                                                 | 2E-181         | Yes                      |
| pfam00404                                                  | Dockerin_1                                                 | 29                                 | 0                    | 0                   | 2.69491                                              | 0.00704        | Yes                      | 2.2195                                                   | 0.02645        | No                       |
| pfam00963                                                  | Cohesin                                                    | 30                                 | 0                    | 0                   | 2.72976                                              | 0.00634        | Yes                      | 2.25409                                                  | 0.02419        | No                       |
| <b>Nitrogen fixation</b>                                   |                                                            |                                    |                      |                     |                                                      |                |                          |                                                          |                |                          |
| COG2710                                                    | Nitrogenase molybdenum-iron protein, alpha and beta chains | 227                                | 295                  | 121                 | -10.0305                                             | 1.1E-23        | Yes                      | -6.52729                                                 | 6.7E-11        | Yes                      |
| COG0347                                                    | Nitrogen regulatory protein PII                            | 89                                 | 90                   | 47                  | -4.24258                                             | 2.2E-05        | Yes                      | -4.02142                                                 | 5.8E-05        | Yes                      |
| COG1348                                                    | Nitrogenase subunit NifH (ATPase)                          | 61                                 | 55                   | 17                  | -2.79347                                             | 0.00521        | Yes                      | -0.31277                                                 | 0.75445        | No                       |
| <b>Sum of all COGs involved<sup>e</sup></b>                |                                                            | <b>578</b>                         | <b>574</b>           | <b>243</b>          | <b>-10.5756</b>                                      | <b>3.9E-26</b> | <b>Yes</b>               | <b>-6.72356</b>                                          | <b>1.8E-11</b> | <b>Yes</b>               |
| <b>Peptidoglycan degradation (by COGs)</b>                 |                                                            |                                    |                      |                     |                                                      |                |                          |                                                          |                |                          |
| COG5632                                                    | N-acetylmuramoyl-L-alanine amidase                         | 53                                 | 9                    | 4                   | 3.19057                                              | 0.00142        | Yes                      | 2.35414                                                  | 0.01857        | No                       |
| COG0860                                                    | N-acetylmuramoyl-L-alanine amidase                         | 212                                | 72                   | 27                  | 3.35195                                              | 0.0008         | Yes                      | 3.41394                                                  | 0.00064        | Yes                      |

| Function ID                     | Function description                | Estimated gene copies <sup>a</sup> |                      |                     | <i>A. wheeleri</i> vs. laboratory <i>N. corniger</i> |                |                          | <i>Amitermes</i> vs. Costa Rican <i>Nasutitermes</i> sp. |                |                          |
|---------------------------------|-------------------------------------|------------------------------------|----------------------|---------------------|------------------------------------------------------|----------------|--------------------------|----------------------------------------------------------|----------------|--------------------------|
|                                 |                                     | Ami <sup>b</sup>                   | Lab Nas <sup>b</sup> | CR Nas <sup>b</sup> | Z-LOR <sup>c</sup>                                   | p-value        | Significant <sup>d</sup> | Z-LOR <sup>c</sup>                                       | p-value        | Significant <sup>d</sup> |
| COG1686                         | D-alanyl-D-alanine carboxypeptidase | 209                                | 66                   | 30                  | 3.75365                                              | 0.00017        | Yes                      | 2.96017                                                  | 0.00307        | Yes                      |
| COG2173                         | D-alanyl-D-alanine dipeptidase      | 61                                 | 5                    | 1                   | 4.03868                                              | 5.4E-05        | Yes                      | 2.72541                                                  | 0.00642        | Yes                      |
| <b>Sum of all COGs involved</b> |                                     | <b>665</b>                         | <b>201</b>           | <b>84</b>           | <b>7.05765</b>                                       | <b>1.7E-12</b> | <b>Yes</b>               | <b>5.9588</b>                                            | <b>2.5E-09</b> | <b>Yes</b>               |

#### Peptidoglycan degradation (by pfams)

|                                              |                                                       |            |            |           |                |                |            |                |                |            |
|----------------------------------------------|-------------------------------------------------------|------------|------------|-----------|----------------|----------------|------------|----------------|----------------|------------|
| pfam02016                                    | Peptidase_S66: Muramoyl-tetrapeptide carboxypeptidase | 57         | 1          | 0         | 3.38727        | 0.00071        | Yes        | 2.90792        | 0.00364        | Yes        |
| pfam01520                                    | Amidase_3: N-acetylmuramoyl-L-alanine amidase         | 206        | 68         | 27        | 3.44737        | 0.00057        | Yes        | 4.50693        | 6.6E-06        | Yes        |
| pfam00768                                    | Peptidase_S11: D-alanyl-D-alanine carboxypeptidase    | 178        | 53         | 26        | 3.74023        | 0.00018        | Yes        | 3.87718        | 0.00011        | Yes        |
| pfam01471                                    | PG_binding_1: Putative peptidoglycan binding domain   | 85         | 1          | 8         | 3.79432        | 0.00015        | Yes        | 3.38939        | 0.0007         | Yes        |
| pfam01510                                    | Amidase_2: N-acetylmuramoyl-L-alanine amidase         | 91         | 18         | 9         | 3.85416        | 0.00012        | Yes        | 3.4453         | 0.00057        | Yes        |
| pfam01427                                    | Peptidase_M15: D-alanyl-D-alanine dipeptidase         | 57         | 5          | 1         | 3.87498        | 0.00011        | Yes        | 2.90792        | 0.00364        | Yes        |
| <b>Sum of all pfams involved<sup>e</sup></b> |                                                       | <b>723</b> | <b>165</b> | <b>78</b> | <b>8.09736</b> | <b>5.6E-16</b> | <b>Yes</b> | <b>8.09736</b> | <b>5.6E-16</b> | <b>Yes</b> |

#### Amino acid transport

|         |                                                                          |     |     |    |          |         |     |          |         |     |
|---------|--------------------------------------------------------------------------|-----|-----|----|----------|---------|-----|----------|---------|-----|
| COG3842 | ABC-type spermidine/putrescine transport, ATPase components              | 191 | 161 | 69 | -4.22695 | 2.4E-05 | Yes | -2.45921 | 0.01392 | No  |
| COG4166 | ABC-type oligopeptide transport, periplasmic component                   | 145 | 128 | 40 | -4.10925 | 4E-05   | Yes | -0.4233  | 0.67208 | No  |
| COG1176 | ABC-type spermidine/putrescine transport, permease component I           | 78  | 72  | 33 | -3.32226 | 0.00089 | Yes | -2.42376 | 0.01536 | No  |
| COG0601 | ABC-type dipeptide/oligopeptide/nickel transport, permease components    | 251 | 176 | 63 | -2.72669 | 0.0064  | Yes | 0.13412  | 0.89331 | No  |
| COG4608 | ABC-type oligopeptide transport, ATPase component                        | 131 | 99  | 28 | -2.57501 | 0.01002 | Yes | 0.86268  | 0.38831 | No  |
| COG1173 | ABC-type dipeptide/oligopeptide/nickel transport, permease components    | 212 | 146 | 86 | -2.32485 | 0.02008 | No  | -3.60919 | 0.00031 | Yes |
| COG1115 | Na <sup>+</sup> /alanine symporter                                       | 129 | 28  | 17 | 4.34046  | 1.4E-05 | Yes | 2.57083  | 0.01015 | No  |
| COG0834 | ABC-type amino acid transport/signal transduction, periplasmic component | 507 | 145 | 85 | 6.68402  | 2.3E-11 | Yes | 3.6078   | 0.00031 | Yes |

#### Amino acid and amine oxidation

|           |                                             |     |     |    |          |         |     |         |         |     |
|-----------|---------------------------------------------|-----|-----|----|----------|---------|-----|---------|---------|-----|
| COG1012   | NAD-dependent aldehyde dehydrogenases       | 95  | 132 | 55 | -7.07674 | 1.5E-12 | Yes | -4.8225 | 1.4E-06 | Yes |
| COG3546   | Mn-containing catalase                      | 31  | 0   | 0  | 2.76694  | 0.00566 | Yes | 2.03804 | 0.04155 | No  |
| COG0753   | Catalase                                    | 39  | 0   | 0  | 3.00257  | 0.00268 | Yes | 2.27132 | 0.02313 | No  |
| COG0665   | Glycine/D-amino acid oxidases (deaminating) | 76  | 3   | 4  | 4.43312  | 9.3E-06 | Yes | 3.08233 | 0.00205 | Yes |
| pfam07833 | Cu_amine_oxidN1, copper amine oxidase       | 167 | 6   | 5  | 6.49891  | 8.1E-11 | Yes | 5.28619 | 1.2E-07 | Yes |
| COG2414   | Aldehyde:ferredoxin oxidoreductase          | 198 | 17  | 15 | 7.25153  | 4.1E-13 | Yes | 4.54519 | 5.5E-06 | Yes |

#### Ammonia transport and assimilation

|         |                             |     |     |    |          |         |     |          |         |     |
|---------|-----------------------------|-----|-----|----|----------|---------|-----|----------|---------|-----|
| COG0004 | Ammonia permease            | 129 | 117 | 27 | -4.11561 | 3.9E-05 | Yes | 0.94786  | 0.3432  | No  |
| COG0069 | Glutamate synthase domain 2 | 172 | 127 | 57 | -2.73268 | 0.00628 | Yes | -1.69523 | 0.09003 | No  |
| COG0174 | Glutamine synthetase        | 241 | 10  | 4  | 7.93291  | 2.1E-15 | Yes | 5.42699  | 5.7E-08 | Yes |

| Function ID                    | Function description                                            | Estimated gene copies <sup>a</sup> |                      |                     | <i>A. wheeleri</i> vs. laboratory <i>N. corniger</i> |                |                          | <i>Amitermes</i> vs. Costa Rican <i>Nasutitermes</i> sp. |                |                          |
|--------------------------------|-----------------------------------------------------------------|------------------------------------|----------------------|---------------------|------------------------------------------------------|----------------|--------------------------|----------------------------------------------------------|----------------|--------------------------|
|                                |                                                                 | Ami <sup>b</sup>                   | Lab Nas <sup>b</sup> | CR Nas <sup>b</sup> | Z-LOR <sup>c</sup>                                   | p-value        | Significant <sup>d</sup> | Z-LOR <sup>c</sup>                                       | p-value        | Significant <sup>d</sup> |
| <b>Urease</b>                  |                                                                 |                                    |                      |                     |                                                      |                |                          |                                                          |                |                          |
| COG0804                        | Urea amidohydrolase (urease) alpha subunit                      | 12                                 | 40                   | 26                  | -5.55089                                             | 2.8E-08        | Yes                      | -6.12284                                                 | 9.2E-10        | Yes                      |
| COG2371                        | Urease accessory protein UreE                                   | 0                                  | 9                    | 11                  | -2.67544                                             | 0.00746        | Yes                      | -3.60133                                                 | 0.00032        | Yes                      |
| COG0830                        | Urease accessory protein UreF                                   | 3                                  | 9                    | 16                  | -2.5823                                              | 0.00981        | Yes                      | -4.82805                                                 | 1.4E-06        | Yes                      |
| COG0831                        | Urea amidohydrolase (urease) gamma subunit                      | 1                                  | 8                    | 8                   | -2.54782                                             | 0.01084        | Yes                      | -3.24606                                                 | 0.00117        | Yes                      |
|                                | <b>Sum of all COGs involved</b>                                 | <b>45</b>                          | <b>83</b>            | <b>93</b>           | <b>-6.70647</b>                                      | <b>2E-11</b>   | <b>Yes</b>               | <b>-11.6002</b>                                          | <b>4.1E-31</b> | <b>Yes</b>               |
| <b>Amino acid biosynthesis</b> |                                                                 |                                    |                      |                     |                                                      |                |                          |                                                          |                |                          |
| <b>Arginine biosynthesis</b>   |                                                                 |                                    |                      |                     |                                                      |                |                          |                                                          |                |                          |
| COG0002                        | Acetylglutamate semialdehyde dehydrogenase                      | 87                                 | 99                   | 26                  | -5.11931                                             | 3.1E-07        | Yes                      | -0.69639                                                 | 0.48619        | No                       |
| COG1364                        | N-acetylglutamate synthase (N-acetylornithine aminotransferase) | 138                                | 111                  | 30                  | -3.17893                                             | 0.00148        | Yes                      | 0.80754                                                  | 0.41936        | No                       |
| COG0137                        | Argininosuccinate synthase                                      | 143                                | 111                  | 42                  | -2.92257                                             | 0.00347        | Yes                      | -0.78799                                                 | 0.4307         | No                       |
| <b>Histidine biosynthesis</b>  |                                                                 |                                    |                      |                     |                                                      |                |                          |                                                          |                |                          |
| COG0040                        | ATP phosphoribosyltransferase                                   | 111                                | 90                   | 34                  | -2.9136                                              | 0.00357        | Yes                      | -0.91986                                                 | 0.35765        | No                       |
| COG0131                        | Imidazoleglycerol-phosphate dehydratase                         | 73                                 | 62                   | 38                  | -2.66143                                             | 0.00778        | Yes                      | -3.55282                                                 | 0.00038        | Yes                      |
| COG0139                        | Phosphoribosyl-AMP cyclohydrolase                               | 30                                 | 31                   | 24                  | -2.56037                                             | 0.01046        | Yes                      | -4.16415                                                 | 3.1E-05        | Yes                      |
| COG1387                        | Histidinol phosphatase and related hydrolases of the PHP family | 139                                | 43                   | 57                  | 3.1549                                               | 0.00161        | Yes                      | -3.00199                                                 | 0.00268        | Yes                      |
| <b>Isoleucine biosynthesis</b> |                                                                 |                                    |                      |                     |                                                      |                |                          |                                                          |                |                          |
| COG0059                        | Ketol-acid reductoisomerase                                     | 85                                 | 105                  | 32                  | -5.71894                                             | 1.1E-08        | Yes                      | -1.86399                                                 | 0.06232        | No                       |
| COG0129                        | Dihydroxyacid dehydratase/phosphogluconate dehydratase          | 128                                | 133                  | 85                  | -5.34206                                             | 9.2E-08        | Yes                      | -6.82119                                                 | 9E-12          | Yes                      |
| COG0028                        | Thiamine pyrophosphate-requiring enzymes                        | 314                                | 220                  | 113                 | -3.04042                                             | 0.00236        | Yes                      | -3.11458                                                 | 0.00184        | Yes                      |
| COG1171                        | Threonine dehydratase                                           | 65                                 | 15                   | 14                  | 2.94487                                              | 0.00323        | Yes                      | 0.5835                                                   | 0.55956        | No                       |
|                                | <b>Sum of all COGs involved</b>                                 | <b>805</b>                         | <b>604</b>           | <b>288</b>          | <b>-6.36242</b>                                      | <b>2E-10</b>   | <b>Yes</b>               | <b>-5.1355</b>                                           | <b>2.8E-07</b> | <b>Yes</b>               |
| <b>Leucine biosynthesis</b>    |                                                                 |                                    |                      |                     |                                                      |                |                          |                                                          |                |                          |
| COG0059                        | Ketol-acid reductoisomerase                                     | 85                                 | 105                  | 32                  | -5.71894                                             | 1.1E-08        | Yes                      | -1.86399                                                 | 0.06232        | No                       |
| COG0473                        | Isocitrate/isopropylmalate dehydrogenase                        | 111                                | 121                  | 67                  | -5.39748                                             | 6.8E-08        | Yes                      | -5.55151                                                 | 2.8E-08        | Yes                      |
| COG0129                        | Dihydroxyacid dehydratase/phosphogluconate dehydratase          | 128                                | 133                  | 85                  | -5.34206                                             | 9.2E-08        | Yes                      | -6.82119                                                 | 9E-12          | Yes                      |
| COG0066                        | 3-isopropylmalate dehydratase small subunit                     | 30                                 | 52                   | 36                  | -5.11662                                             | 3.1E-07        | Yes                      | -6.25371                                                 | 4E-10          | Yes                      |
| COG0028                        | Thiamine pyrophosphate-requiring enzymes                        | 314                                | 220                  | 113                 | -3.04042                                             | 0.00236        | Yes                      | -3.11458                                                 | 0.00184        | Yes                      |
| COG0065                        | 3-isopropylmalate dehydratase large subunit                     | 144                                | 107                  | 45                  | -2.55431                                             | 0.01064        | Yes                      | -1.17309                                                 | 0.24076        | No                       |
|                                | <b>Sum of all COGs involved</b>                                 | <b>1440</b>                        | <b>1120</b>          | <b>535</b>          | <b>-9.5164</b>                                       | <b>1.8E-21</b> | <b>Yes</b>               | <b>-7.72287</b>                                          | <b>1.1E-14</b> | <b>Yes</b>               |

| Function ID                                | Function description                                                  | Estimated gene copies <sup>a</sup> |                      |                     | <i>A. wheeleri</i> vs. laboratory <i>N. corniger</i> |                |                          | <i>Amitermes</i> vs. Costa Rican <i>Nasutitermes</i> sp. |                |                          |
|--------------------------------------------|-----------------------------------------------------------------------|------------------------------------|----------------------|---------------------|------------------------------------------------------|----------------|--------------------------|----------------------------------------------------------|----------------|--------------------------|
|                                            |                                                                       | Ami <sup>b</sup>                   | Lab Nas <sup>b</sup> | CR Nas <sup>b</sup> | Z-LOR <sup>c</sup>                                   | p-value        | Significant <sup>d</sup> | Z-LOR <sup>c</sup>                                       | p-value        | Significant <sup>d</sup> |
| <b>Methionine biosynthesis</b>             |                                                                       |                                    |                      |                     |                                                      |                |                          |                                                          |                |                          |
| COG1410                                    | Methionine synthase I, cobalamin-binding domain                       | 177                                | 197                  | 71                  | -7.05189                                             | 1.8E-12        | Yes                      | -3.2044                                                  | 0.00135        | Yes                      |
| COG0626                                    | Cystathionine beta-lyases/cystathionine gamma-synthases               | 94                                 | 118                  | 32                  | -6.15222                                             | 7.6E-10        | Yes                      | -1.39706                                                 | 0.16239        | No                       |
| COG0620                                    | Methionine synthase II (cobalamin-independent)                        | 0                                  | 5                    | 9                   | -2.03784                                             | 0.04157        | No                       | -3.37804                                                 | 0.00073        | Yes                      |
|                                            | <b>Sum of all COGs involved</b>                                       | <b>1420</b>                        | <b>969</b>           | <b>340</b>          | <b>-5.94634</b>                                      | <b>2.7E-09</b> | <b>Yes</b>               | <b>0.82445</b>                                           | <b>0.40968</b> | <b>No</b>                |
| <b>Phenylalanine/tyrosine biosynthesis</b> |                                                                       |                                    |                      |                     |                                                      |                |                          |                                                          |                |                          |
| COG0169                                    | Shikimate 5-dehydrogenase                                             | 86                                 | 84                   | 51                  | -3.90799                                             | 9.3E-05        | Yes                      | -4.75912                                                 | 1.9E-06        | Yes                      |
| COG0077                                    | Prephenate dehydratase                                                | 76                                 | 67                   | 53                  | -2.96541                                             | 0.00302        | Yes                      | -5.6059                                                  | 2.1E-08        | Yes                      |
| COG0710                                    | 3-dehydroquinate dehydratase                                          | 41                                 | 42                   | 22                  | -2.94728                                             | 0.00321        | Yes                      | -2.80375                                                 | 0.00505        | Yes                      |
|                                            | <b>Sum of all COGs involved</b>                                       | <b>1029</b>                        | <b>706</b>           | <b>456</b>          | <b>-5.17658</b>                                      | <b>2.3E-07</b> | <b>Yes</b>               | <b>-10.0865</b>                                          | <b>6.3E-24</b> | <b>Yes</b>               |
| <b>Tryptophan biosynthesis</b>             |                                                                       |                                    |                      |                     |                                                      |                |                          |                                                          |                |                          |
| COG0512                                    | Anthranilate/para-aminobenzoate synthases component II                | 55                                 | 68                   | 32                  | -4.60552                                             | 4.1E-06        | Yes                      | -3.69697                                                 | 0.00022        | Yes                      |
| COG0547                                    | Anthranilate phosphoribosyltransferase                                | 120                                | 117                  | 27                  | -4.6009                                              | 4.2E-06        | Yes                      | 0.60214                                                  | 0.54708        | No                       |
| COG0159                                    | Tryptophan synthase alpha chain                                       | 75                                 | 83                   | 55                  | -4.54696                                             | 5.4E-06        | Yes                      | -5.93449                                                 | 2.9E-09        | Yes                      |
| COG0147                                    | Anthranilate/para-aminobenzoate synthases component I                 | 93                                 | 92                   | 41                  | -4.16359                                             | 3.1E-05        | Yes                      | -2.90469                                                 | 0.00368        | Yes                      |
| COG0169                                    | Shikimate 5-dehydrogenase                                             | 86                                 | 84                   | 51                  | -3.90799                                             | 9.3E-05        | Yes                      | -4.75912                                                 | 1.9E-06        | Yes                      |
| COG0135                                    | Phosphoribosylanthranilate isomerase                                  | 43                                 | 46                   | 39                  | -3.25483                                             | 0.00113        | Yes                      | -5.72517                                                 | 1E-08          | Yes                      |
| COG0134                                    | Indole-3-glycerol phosphate synthase                                  | 85                                 | 75                   | 29                  | -3.14243                                             | 0.00168        | Yes                      | -1.33981                                                 | 0.18031        | No                       |
| COG0710                                    | 3-dehydroquinate dehydratase                                          | 41                                 | 42                   | 22                  | -2.94728                                             | 0.00321        | Yes                      | -2.80375                                                 | 0.00505        | Yes                      |
| COG0133                                    | Tryptophan synthase beta chain                                        | 134                                | 100                  | 53                  | -2.49968                                             | 0.01243        | No                       | -2.68705                                                 | 0.00721        | Yes                      |
|                                            | <b>Sum of all COGs involved</b>                                       | <b>1440</b>                        | <b>1145</b>          | <b>583</b>          | <b>-10.1353</b>                                      | <b>3.9E-24</b> | <b>Yes</b>               | <b>-9.72277</b>                                          | <b>2.4E-22</b> | <b>Yes</b>               |
| <b>Valine biosynthesis</b>                 |                                                                       |                                    |                      |                     |                                                      |                |                          |                                                          |                |                          |
| COG0059                                    | Ketol-acid reductoisomerase                                           | 85                                 | 105                  | 32                  | -5.71894                                             | 1.1E-08        | Yes                      | -1.86399                                                 | 0.06232        | No                       |
| COG0129                                    | Dihydroxyacid dehydratase/phosphogluconate dehydratase                | 128                                | 133                  | 85                  | -5.34206                                             | 9.2E-08        | Yes                      | -6.82119                                                 | 9E-12          | Yes                      |
| COG0436                                    | Aspartate/tyrosine/aromatic aminotransferase                          | 520                                | 350                  | 153                 | -3.28706                                             | 0.00101        | Yes                      | -1.52434                                                 | 0.12742        | No                       |
| COG0028                                    | Thiamine pyrophosphate-requiring enzymes                              | 314                                | 220                  | 113                 | -3.04042                                             | 0.00236        | Yes                      | -3.11458                                                 | 0.00184        | Yes                      |
|                                            | <b>Sum of all COGs involved</b>                                       | <b>1260</b>                        | <b>939</b>           | <b>427</b>          | <b>-7.79551</b>                                      | <b>6.4E-15</b> | <b>Yes</b>               | <b>-5.33275</b>                                          | <b>9.7E-08</b> | <b>Yes</b>               |
| <b>Vitamin biosynthesis</b>                |                                                                       |                                    |                      |                     |                                                      |                |                          |                                                          |                |                          |
| <b>Thiamine biosynthesis</b>               |                                                                       |                                    |                      |                     |                                                      |                |                          |                                                          |                |                          |
| COG1060                                    | Thiamine biosynthesis enzyme ThiH and related uncharacterized enzymes | 110                                | 162                  | 50                  | -8.17842                                             | 2.9E-16        | Yes                      | -3.372                                                   | 0.00075        | Yes                      |
| COG0422                                    | Thiamine biosynthesis protein ThiC                                    | 40                                 | 47                   | 9                   | -3.64565                                             | 0.00027        | Yes                      | 0.34759                                                  | 0.72815        | No                       |
| COG0352                                    | Thiamine monophosphate synthase                                       | 37                                 | 43                   | 33                  | -3.44837                                             | 0.00056        | Yes                      | -5.21717                                                 | 1.8E-07        | Yes                      |

| Function ID                     | Function description                                                  | Estimated gene copies <sup>a</sup> |                      |                     | <i>A. wheeleri</i> vs. laboratory <i>N. corniger</i> |                |                          | <i>Amitermes</i> vs. Costa Rican <i>Nasutitermes</i> sp. |                |                          |
|---------------------------------|-----------------------------------------------------------------------|------------------------------------|----------------------|---------------------|------------------------------------------------------|----------------|--------------------------|----------------------------------------------------------|----------------|--------------------------|
|                                 |                                                                       | Ami <sup>b</sup>                   | Lab Nas <sup>b</sup> | CR Nas <sup>b</sup> | Z-LOR <sup>c</sup>                                   | p-value        | Significant <sup>d</sup> | Z-LOR <sup>c</sup>                                       | p-value        | Significant <sup>d</sup> |
| COG0476                         | Dinucleotide-utilizing enzymes in molybdopterin/thiamine biosynthesis | 97                                 | 72                   | 49                  | -2.08872                                             | 0.03673        | No                       | -3.88391                                                 | 0.0001         | Yes                      |
| COG0351                         | Hydroxymethylpyrimidine/phosphomethylpyrimidine kinase                | 47                                 | 39                   | 29                  | -2.01451                                             | 0.04396        | No                       | -3.72964                                                 | 0.00019        | Yes                      |
| <b>Sum of all COGs involved</b> |                                                                       | <b>523</b>                         | <b>488</b>           | <b>240</b>          | <b>-8.90767</b>                                      | <b>5.2E-19</b> | <b>Yes</b>               | <b>-7.71726</b>                                          | <b>1.2E-14</b> | <b>Yes</b>               |

#### Biotin

|                                 |                                                            |            |            |            |                 |                |            |                |                |            |
|---------------------------------|------------------------------------------------------------|------------|------------|------------|-----------------|----------------|------------|----------------|----------------|------------|
| COG0502                         | Biotin synthase and related enzymes                        | 53         | 63         | 44         | -4.2699         | 2E-05          | Yes        | -5.77369       | 7.8E-09        | Yes        |
| COG0161                         | Adenosylmethionine-8-amino-7-oxononanoate aminotransferase | 22         | 28         | 5          | -3.03302        | 0.00242        | Yes        | 0.23854        | 0.81146        | No         |
| COG0156                         | 7-keto-8-aminopelargonate synthetase and related enzymes   | 96         | 27         | 16         | 2.96429         | 0.00303        | Yes        | 1.58653        | 0.11262        | No         |
| <b>Sum of all COGs involved</b> |                                                            | <b>280</b> | <b>186</b> | <b>100</b> | <b>-2.32779</b> | <b>0.01992</b> | <b>Yes</b> | <b>-3.0082</b> | <b>0.00263</b> | <b>Yes</b> |

#### Cobalamin biosynthesis

|         |                                                              |    |    |    |          |         |     |          |         |    |
|---------|--------------------------------------------------------------|----|----|----|----------|---------|-----|----------|---------|----|
| COG0310 | ABC-type Co2+ transport system, permease component           | 7  | 40 | 6  | -5.77504 | 7.7E-09 | Yes | -2.17365 | 0.02973 | No |
| COG1429 | Cobalamin biosynthesis protein CobN and related Mg-chelataes | 13 | 25 | 10 | -3.73424 | 0.00019 | Yes | -2.61781 | 0.00885 | No |

#### Inorganic phosphate metabolism

|         |                         |     |     |    |          |         |     |          |         |     |
|---------|-------------------------|-----|-----|----|----------|---------|-----|----------|---------|-----|
| COG1785 | Alkaline phosphatase    | 40  | 54  | 18 | -4.42507 | 9.6E-06 | Yes | -1.9906  | 0.04653 | No  |
| COG1283 | Na+/phosphate symporter | 163 | 122 | 43 | -2.78402 | 0.00537 | Yes | -0.18018 | 0.85701 | No  |
| COG0855 | Polyphosphate kinase    | 191 | 139 | 76 | -2.73772 | 0.00619 | Yes | -3.25971 | 0.00112 | Yes |

#### Sugar transporter

|                                 |                                                                        |             |             |            |                |                |            |                |                |            |
|---------------------------------|------------------------------------------------------------------------|-------------|-------------|------------|----------------|----------------|------------|----------------|----------------|------------|
| COG4213                         | ABC-type xylose transport, periplasmic component                       | 91          | 113         | 26         | -5.96143       | 2.5E-09        | Yes        | -0.49776       | 0.61866        | No         |
| COG0395                         | ABC-type sugar transport, permease component                           | 783         | 357         | 190        | 2.5488         | 0.01081        | Yes        | 0.65247        | 0.5141         | No         |
| COG3090                         | TRAP-type C4-dicarboxylate transport, small permease component         | 35          | 6           | 9          | 2.58176        | 0.00983        | Yes        | -0.0142        | 0.98867        | No         |
| COG1653                         | ABC-type sugar transport, periplasmic component                        | 729         | 327         | 197        | 2.69079        | 0.00713        | Yes        | -0.68551       | 0.49302        | No         |
| COG4211                         | ABC-type glucose/galactose transport, permease component               | 46          | 9           | 0          | 2.76721        | 0.00565        | Yes        | 2.439          | 0.01473        | No         |
| COG2211                         | Na+/melibiose symporter and related transporters                       | 204         | 68          | 47         | 3.39866        | 0.00068        | Yes        | 0.64641        | 0.51802        | No         |
| COG1129                         | ABC-type sugar transport, ATPase component                             | 578         | 232         | 64         | 3.73491        | 0.00019        | Yes        | 6.36224        | 2E-10          | Yes        |
| COG1175                         | ABC-type sugar transport, permease components                          | 525         | 205         | 101        | 3.85909        | 0.00011        | Yes        | 2.62438        | 0.00868        | No         |
| COG0738                         | Fucose permease                                                        | 104         | 8           | 13         | 5.29397        | 1.2E-07        | Yes        | 2.43445        | 0.01491        | No         |
| COG1172                         | Ribose/xylose/arabinose/galactoside ABC transport, permease components | 249         | 57          | 34         | 5.80172        | 6.6E-09        | Yes        | 3.43462        | 0.00059        | Yes        |
| <b>Sum of all COGs involved</b> |                                                                        | <b>4651</b> | <b>2034</b> | <b>919</b> | <b>7.51814</b> | <b>5.6E-14</b> | <b>Yes</b> | <b>6.76013</b> | <b>1.4E-11</b> | <b>Yes</b> |

#### Glycolysis

|         |                       |     |     |     |          |         |     |          |         |    |
|---------|-----------------------|-----|-----|-----|----------|---------|-----|----------|---------|----|
| COG0205 | 6-phosphofructokinase | 323 | 271 | 100 | -5.43506 | 5.5E-08 | Yes | -1.66977 | 0.09497 | No |
| COG0837 | Glucokinase           | 6   | 15  | 6   | -3.18651 | 0.00144 | Yes | -2.36158 | 0.0182  | No |
| COG0696 | Phosphoglyceromutase  | 216 | 154 | 36  | -2.6995  | 0.00694 | Yes | 2.38035  | 0.0173  | No |

| Function ID | Function description                              | Estimated gene copies <sup>a</sup> |                      |                     | <i>A. wheeleri</i> vs. laboratory <i>N. corniger</i> |         |                          | <i>Amitermes</i> vs. Costa Rican <i>Nasutitermes</i> sp. |         |                          |
|-------------|---------------------------------------------------|------------------------------------|----------------------|---------------------|------------------------------------------------------|---------|--------------------------|----------------------------------------------------------|---------|--------------------------|
|             |                                                   | Ami <sup>b</sup>                   | Lab Nas <sup>b</sup> | CR Nas <sup>b</sup> | Z-LOR <sup>c</sup>                                   | p-value | Significant <sup>d</sup> | Z-LOR <sup>c</sup>                                       | p-value | Significant <sup>d</sup> |
| COG3635     | Predicted phosphoglycerate mutase, AP superfamily | 97                                 | 7                    | 10                  | 5.12615                                              | 3E-07   | Yes                      | 2.73646                                                  | 0.00621 | Yes                      |

#### Pentose phosphate pathway

|                                 |                                                               |            |            |            |                 |                |            |                 |                |            |
|---------------------------------|---------------------------------------------------------------|------------|------------|------------|-----------------|----------------|------------|-----------------|----------------|------------|
| COG0021                         | Transketolase                                                 | 104        | 163        | 61         | -8.54722        | 1.3E-17        | Yes        | -5.14751        | 2.6E-07        | Yes        |
| COG0120                         | Ribose 5-phosphate isomerase                                  | 27         | 46         | 32         | -4.76749        | 1.9E-06        | Yes        | -5.86838        | 4.4E-09        | Yes        |
| COG0362                         | 6-phosphogluconate dehydrogenase                              | 85         | 81         | 27         | -3.70193        | 0.00021        | Yes        | -0.98074        | 0.32672        | No         |
| COG0363                         | 6-phosphogluconolactonase/Glucosamine-6-P isomerase/deaminase | 82         | 23         | 13         | 2.74817         | 0.00599        | Yes        | 1.60259         | 0.10902        | No         |
| COG0698                         | Ribose 5-phosphate isomerase RpiB                             | 79         | 13         | 9          | 3.94842         | 7.9E-05        | Yes        | 2.2993          | 0.02149        | No         |
| <b>Sum of all COGs involved</b> |                                                               | <b>648</b> | <b>449</b> | <b>207</b> | <b>-4.27707</b> | <b>1.9E-05</b> | <b>Yes</b> | <b>-2.99373</b> | <b>0.00276</b> | <b>Yes</b> |

#### Hydrogenase

|           |                                                        |     |     |     |          |         |     |          |         |     |
|-----------|--------------------------------------------------------|-----|-----|-----|----------|---------|-----|----------|---------|-----|
| COG4624   | Iron only hydrogenase large subunit, C-terminal domain | 341 | 225 | 163 | -2.41317 | 0.01581 | No  | -6.57231 | 5E-11   | Yes |
| pfam02906 | Fe_hyd_lg_C                                            | 364 | 245 | 217 | -2.79211 | 0.00524 | Yes | -6.91755 | 4.6E-12 | Yes |
| COG3261   | Ni,Fe-hydrogenase III large subunit                    | 39  | 5   | 1   | 3.01321  | 0.00258 | Yes | 2.27132  | 0.02313 | No  |

#### Pyruvate decarboxylation

|         |                       |     |    |    |          |         |     |         |         |    |
|---------|-----------------------|-----|----|----|----------|---------|-----|---------|---------|----|
| COG0280 | Phosphotransacetylase | 103 | 93 | 26 | -3.64155 | 0.00027 | Yes | 0.06017 | 0.95202 | No |
|---------|-----------------------|-----|----|----|----------|---------|-----|---------|---------|----|

#### Homoacetogenesis

|         |                                                                             |     |    |    |          |         |     |          |         |     |
|---------|-----------------------------------------------------------------------------|-----|----|----|----------|---------|-----|----------|---------|-----|
| COG1456 | CO dehydrogenase/acetyl-CoA synthase gamma subunit (corrinoid Fe-S protein) | 49  | 70 | 39 | -5.25996 | 1.4E-07 | Yes | -5.29079 | 1.2E-07 | Yes |
| COG1152 | CO dehydrogenase/acetyl-CoA synthase alpha subunit                          | 12  | 26 | 8  | -4.00056 | 6.3E-05 | Yes | -2.09887 | 0.03583 | No  |
| COG1151 | 6Fe-6S prismatic cluster-containing protein                                 | 46  | 53 | 42 | -3.79454 | 0.00015 | Yes | -5.96318 | 2.5E-09 | Yes |
| COG2069 | CO dehydrogenase/acetyl-CoA synthase delta subunit (corrinoid Fe-S protein) | 19  | 25 | 11 | -2.94847 | 0.00319 | Yes | -2.15624 | 0.03107 | No  |
| COG1614 | CO dehydrogenase/acetyl-CoA synthase beta subunit                           | 33  | 33 | 34 | -2.53041 | 0.01139 | No  | -5.70236 | 1.2E-08 | Yes |
| COG0243 | Anaerobic dehydrogenases, typically selenocysteine-containing               | 75  | 7  | 5  | 4.42522  | 9.6E-06 | Yes | 2.91156  | 0.0036  | Yes |
| COG1882 | Pyruvate-formate lyase                                                      | 207 | 33 | 30 | 6.47531  | 9.5E-11 | Yes | 2.90913  | 0.00362 | Yes |

#### Cell motility

##### Chemotaxis

|                                 |                                                       |             |             |            |                 |               |            |                 |              |            |
|---------------------------------|-------------------------------------------------------|-------------|-------------|------------|-----------------|---------------|------------|-----------------|--------------|------------|
| COG0840                         | Methyl-accepting chemotaxis protein                   | 825         | 1878        | 565        | -34.7592        | 1E-264        | Yes        | -18.0801        | 4.6E-73      | Yes        |
| COG1352                         | Methylase of chemotaxis methyl-accepting proteins     | 183         | 143         | 40         | -3.3725         | 0.00074       | Yes        | 0.90086         | 0.36766      | No         |
| COG1776                         | Chemotaxis protein CheC, inhibitor of MCP methylation | 110         | 29          | 16         | 3.40341         | 0.00067       | Yes        | 2.11008         | 0.03485      | No         |
| <b>Sum of all COGs involved</b> |                                                       | <b>2055</b> | <b>2578</b> | <b>847</b> | <b>-29.1401</b> | <b>1E-186</b> | <b>Yes</b> | <b>-12.1467</b> | <b>6E-34</b> | <b>Yes</b> |

#### Flagellum structure and biogenesis

|         |                                                |     |     |     |          |         |     |         |         |     |
|---------|------------------------------------------------|-----|-----|-----|----------|---------|-----|---------|---------|-----|
| COG1344 | Flagellin and related hook-associated proteins | 617 | 533 | 225 | -8.07159 | 6.9E-16 | Yes | -4.5605 | 5.1E-06 | Yes |
|---------|------------------------------------------------|-----|-----|-----|----------|---------|-----|---------|---------|-----|

| Function ID                     | Function description                                          | Estimated gene copies <sup>a</sup> |                      |                     | <i>A. wheeleri</i> vs. laboratory <i>N. corniger</i> |                |                          | <i>Amitermes</i> vs. Costa Rican <i>Nasutitermes</i> sp. |                |                          |
|---------------------------------|---------------------------------------------------------------|------------------------------------|----------------------|---------------------|------------------------------------------------------|----------------|--------------------------|----------------------------------------------------------|----------------|--------------------------|
|                                 |                                                               | Ami <sup>b</sup>                   | Lab Nas <sup>b</sup> | CR Nas <sup>b</sup> | Z-LOR <sup>c</sup>                                   | p-value        | Significant <sup>d</sup> | Z-LOR <sup>c</sup>                                       | p-value        | Significant <sup>d</sup> |
| COG1987                         | Flagellar biosynthesis pathway, component FliQ                | 41                                 | 52                   | 17                  | -4.12089                                             | 3.8E-05        | Yes                      | -1.67477                                                 | 0.09398        | No                       |
| COG1580                         | Flagellar basal body-associated protein                       | 28                                 | 41                   | 23                  | -4.0967                                              | 4.2E-05        | Yes                      | -4.14634                                                 | 3.4E-05        | Yes                      |
| COG3144                         | Flagellar hook-length control protein                         | 31                                 | 41                   | 14                  | -3.79215                                             | 0.00015        | Yes                      | -1.76564                                                 | 0.07746        | No                       |
| COG1419                         | Flagellar GTP-binding protein                                 | 87                                 | 81                   | 33                  | -3.57222                                             | 0.00035        | Yes                      | -1.92771                                                 | 0.05389        | No                       |
| COG1749                         | Flagellar hook protein FlgE                                   | 167                                | 135                  | 46                  | -3.5454                                              | 0.00039        | Yes                      | -0.44503                                                 | 0.6563         | No                       |
| COG1536                         | Flagellar motor switch protein                                | 218                                | 168                  | 125                 | -3.53148                                             | 0.00041        | Yes                      | -7.19951                                                 | 6E-13          | Yes                      |
| COG1157                         | Flagellar biosynthesis/type III secretory pathway ATPase      | 162                                | 130                  | 62                  | -3.42239                                             | 0.00062        | Yes                      | -2.69938                                                 | 0.00695        | Yes                      |
| COG1886                         | Flagellar motor switch/type III secretory pathway protein     | 53                                 | 54                   | 39                  | -3.31863                                             | 0.0009         | Yes                      | -5.00956                                                 | 5.5E-07        | Yes                      |
| COG1766                         | Flagellar biosynthesis/type III secretory pathway lipoprotein | 174                                | 131                  | 35                  | -2.93211                                             | 0.00337        | Yes                      | 1.29749                                                  | 0.19446        | No                       |
| COG1317                         | Flagellar biosynthesis/type III secretory pathway protein     | 73                                 | 57                   | 40                  | -2.12466                                             | 0.03362        | No                       | -3.87353                                                 | 0.00011        | Yes                      |
| COG1868                         | Flagellar motor switch protein                                | 151                                | 106                  | 71                  | -2.124                                               | 0.03367        | No                       | -4.23255                                                 | 2.3E-05        | Yes                      |
| COG1815                         | Flagellar basal body protein                                  | 74                                 | 57                   | 34                  | -2.05377                                             | 0.04           | No                       | -2.8276                                                  | 0.00469        | Yes                      |
| COG1334                         | Uncharacterized flagellar protein FlaG                        | 25                                 | 24                   | 24                  | -2.03694                                             | 0.04166        | No                       | -4.62859                                                 | 3.7E-06        | Yes                      |
| COG1843                         | Flagellar hook capping protein                                | 163                                | 57                   | 58                  | 2.78105                                              | 0.00542        | Yes                      | -2.15998                                                 | 0.03077        | No                       |
| <b>Sum of all COGs involved</b> |                                                               | <b>4011</b>                        | <b>2803</b>          | <b>1401</b>         | <b>-11.1036</b>                                      | <b>1.2E-28</b> | <b>Yes</b>               | <b>-10.6674</b>                                          | <b>1.4E-26</b> | <b>Yes</b>               |

#### Pilus

|                                 |                                                                   |            |            |            |                |                |            |                 |              |            |
|---------------------------------|-------------------------------------------------------------------|------------|------------|------------|----------------|----------------|------------|-----------------|--------------|------------|
| COG3063                         | Tfp pilus assembly protein PilF                                   | 217        | 207        | 148        | -5.92919       | 3E-09          | Yes        | -9.20561        | 3.4E-20      | Yes        |
| COG4972                         | Tfp pilus assembly protein, ATPase PilM                           | 31         | 38         | 6          | -3.41528       | 0.00064        | Yes        | 0.62513         | 0.53188      | No         |
| COG3166                         | Tfp pilus assembly protein PilN                                   | 2          | 11         | 1          | -3.02806       | 0.00246        | Yes        | -0.54729        | 0.58418      | No         |
| COG3188                         | P pilus assembly protein, porin PapC                              | 11         | 18         | 13         | -2.91453       | 0.00356        | Yes        | -3.73605        | 0.00019      | Yes        |
| COG2805                         | Tfp pilus assembly protein, pilus retraction ATPase PilT          | 139        | 45         | 24         | 2.94472        | 0.00323        | Yes        | 1.77837         | 0.07534      | No         |
| COG2804                         | Type II secretory pathway, ATPase Pule/Tfp pilus assembly pathway | 226        | 80         | 45         | 3.19613        | 0.00139        | Yes        | 1.53491         | 0.1248       | No         |
| <b>Sum of all COGs involved</b> |                                                                   | <b>719</b> | <b>445</b> | <b>245</b> | <b>-2.4794</b> | <b>0.01316</b> | <b>Yes</b> | <b>-4.10584</b> | <b>4E-05</b> | <b>Yes</b> |

#### Defense

|         |                                                                               |     |     |     |          |         |     |          |         |     |
|---------|-------------------------------------------------------------------------------|-----|-----|-----|----------|---------|-----|----------|---------|-----|
| COG4096 | Type I site-specific restriction-modification system, R (restriction) subunit | 86  | 119 | 25  | -6.69779 | 2.1E-11 | Yes | -0.56326 | 0.57326 | No  |
| COG4452 | Inner membrane protein involved in colicin E2 resistance                      | 47  | 76  | 18  | -5.94765 | 2.7E-09 | Yes | -1.45642 | 0.14528 | No  |
| COG0841 | Cation/multidrug efflux pump                                                  | 840 | 580 | 206 | -4.68651 | 2.8E-06 | Yes | 0.5424   | 0.58754 | No  |
| COG0286 | Type I restriction-modification system methyltransferase subunit              | 477 | 216 | 81  | 2.06695  | 0.03874 | No  | 3.41188  | 0.00065 | Yes |
| COG4823 | Abortive infection bacteriophage resistance protein                           | 88  | 24  | 6   | 2.93771  | 0.00331 | Yes | 3.13399  | 0.00172 | Yes |
| COG2720 | Uncharacterized vancomycin resistance protein                                 | 45  | 2   | 0   | 3.44673  | 0.00057 | Yes | 2.41668  | 0.01566 | No  |
| COG1619 | Uncharacterized proteins, homologs of microcin C7 resistance protein MccF     | 62  | 1   | 0   | 3.47656  | 0.00051 | Yes | 2.7419   | 0.00611 | Yes |
| COG0732 | Restriction endonuclease S subunits                                           | 178 | 50  | 42  | 4.04285  | 5.3E-05 | Yes | 0.47052  | 0.63799 | No  |
| COG1403 | Restriction endonuclease                                                      | 75  | 9   | 10  | 4.24516  | 2.2E-05 | Yes | 1.93544  | 0.05294 | No  |
| COG1136 | ABC-type antimicrobial peptide transport system, ATPase component             | 662 | 223 | 108 | 6.01582  | 1.8E-09 | Yes | 4.33898  | 1.4E-05 | Yes |

| Function ID                     | Function description                                  | Estimated gene copies <sup>a</sup> |                      |                     | A. wheeleri vs. laboratory N. corniger |                |                          | Amitermes vs. Costa Rican Nasutitermes sp. |                |                          |
|---------------------------------|-------------------------------------------------------|------------------------------------|----------------------|---------------------|----------------------------------------|----------------|--------------------------|--------------------------------------------|----------------|--------------------------|
|                                 |                                                       | Ami <sup>b</sup>                   | Lab Nas <sup>b</sup> | CR Nas <sup>b</sup> | Z-LOR <sup>c</sup>                     | p-value        | Significant <sup>d</sup> | Z-LOR <sup>c</sup>                         | p-value        | Significant <sup>d</sup> |
| COG1131                         | ABC-type multidrug transport system, ATPase component | 740                                | 238                  | 107                 | 6.87338                                | 6.3E-12        | Yes                      | 5.52279                                    | 3.3E-08        | Yes                      |
| COG2274                         | ABC-type bacteriocin/lantibiotic exporters            | 590                                | 147                  | 57                  | 8.32696                                | 8.3E-17        | Yes                      | 7.02703                                    | 2.1E-12        | Yes                      |
| <b>Sum of all COGs involved</b> |                                                       | <b>6768</b>                        | <b>3186</b>          | <b>1247</b>         | <b>5.86928</b>                         | <b>4.4E-09</b> | <b>Yes</b>               | <b>10.2527</b>                             | <b>1.2E-24</b> | <b>Yes</b>               |

### Sporulation

|                                  |                                                                |             |            |            |                |                |            |                |                |            |
|----------------------------------|----------------------------------------------------------------|-------------|------------|------------|----------------|----------------|------------|----------------|----------------|------------|
| pfam05036                        | SPOR : Sporulation related domain                              | 124         | 95         | 61         | -2.64127       | 0.00826        | Yes        | -2.56194       | 0.01041        | No         |
| pfam09546                        | Spore_III_AE : Stage III sporulation protein AE (spore_III_AE) | 27          | 2          | 1          | 2.69688        | 0.007          | Yes        | 2.14659        | 0.03183        | No         |
| pfam06686                        | SpolIAC : Stage III sporulation protein AC/AD protein family   | 30          | 1          | 2          | 2.72976        | 0.00634        | Yes        | 2.18841        | 0.02864        | No         |
| pfam08769                        | SpoOA_C : Sporulation initiation factor SpoOA C terminal       | 35          | 0          | 0          | 2.88809        | 0.00388        | Yes        | 2.41132        | 0.01589        | No         |
| pfam03862                        | SpoVA : SpoVA protein                                          | 34          | 3          | 2          | 2.99099        | 0.00278        | Yes        | 2.36854        | 0.01786        | No         |
| pfam07451                        | SpoVAD : Stage V sporulation protein AD (SpoVAD)               | 44          | 1          | 0          | 3.12265        | 0.00179        | Yes        | 2.64452        | 0.00818        | Yes        |
| pfam07454                        | SpolIP : Stage II sporulation protein P (SpolIP)               | 45          | 0          | 0          | 3.14565        | 0.00166        | Yes        | 2.66741        | 0.00764        | Yes        |
| pfam02650                        | HTH_WhiA : Sporulation Regulator WhiA C terminal domain        | 52          | 0          | 0          | 3.29351        | 0.00099        | Yes        | 2.81456        | 0.00488        | Yes        |
| pfam09547                        | Spore_IV_A : Stage IV sporulation protein A (spore_IV_A)       | 57          | 0          | 0          | 3.38727        | 0.00071        | Yes        | 2.90792        | 0.00364        | Yes        |
| pfam05580                        | SpoIVB peptidase S55: SpoIVB peptidase S55                     | 51          | 2          | 0          | 3.62416        | 0.00029        | Yes        | 2.7948         | 0.00519        | Yes        |
| pfam01943                        | Polysacc_synt: Spore formation                                 | 121         | 20         | 6          | 4.86321        | 1.2E-06        | Yes        | 4.52949        | 5.9E-06        | Yes        |
| <b>Sum of all pfams involved</b> |                                                                | <b>1395</b> | <b>458</b> | <b>262</b> | <b>6.26254</b> | <b>3.8E-10</b> | <b>Yes</b> | <b>6.26254</b> | <b>3.8E-10</b> | <b>Yes</b> |

### Germination

|                                  |                                                            |            |           |           |                |                |            |                |                |            |
|----------------------------------|------------------------------------------------------------|------------|-----------|-----------|----------------|----------------|------------|----------------|----------------|------------|
| pfam03418                        | Peptidase_A25 : Germination protease                       | 30         | 0         | 0         | 2.72976        | 0.00634        | Yes        | 2.25409        | 0.02419        | No         |
| pfam03323                        | GerA : Bacillus/Clostridium GerA spore germination protein | 78         | 1         | 1         | 3.70692        | 0.00021        | Yes        | 3.22645        | 0.00125        | Yes        |
| <b>Sum of all pfams involved</b> |                                                            | <b>202</b> | <b>31</b> | <b>20</b> | <b>5.52594</b> | <b>3.3E-08</b> | <b>Yes</b> | <b>5.52594</b> | <b>3.3E-08</b> | <b>Yes</b> |

<sup>a</sup>Estimated gene copy is the number of genes weighted by their individual read depth, which reflects population abundance.

<sup>b</sup>Ami = *A. wheeleri*; Lab Nas = Laboratory *N. corniger*; CR Nas = Costa Rican *Nasutitermes* sp.

<sup>c</sup>Z-LOR is the calculated as the natural logarithm of odds ratio (LOR) divided by the standard error of LOR. P-value is calculated from Z-LOR.

<sup>d</sup>Statistical significance was determined after adjusting for multiple hypothesis test, with a false discovery rate cutoff of 0.05.

<sup>e</sup>Functions involved in this pathway were added up, although only the individual function with a statistical differences was shown.

<sup>f</sup>Color indication:  = function statistically overrepresented in *A. wheeleri* in both comparisons;  = function statistically overrepresented in *A. wheeleri* in only one comparison, and the overrepresentation is supported by the other comparison (Z-LOR > 2);  = function statistically overrepresented in *A. wheeleri* in only one comparison, and the overrepresentation is neither supported nor against by the other comparison (abs(Z-LOR) < 2);  = function statistically underrepresented in *A. wheeleri* in both comparisons;  = function statistically underrepresented in *A. wheeleri* in only one comparison, and the underrepresentation is supported by the other comparison (Z-LOR < -2);  = function statistically underrepresented in *A. wheeleri* in only one comparison, and the underrepresentation is neither supported nor against by the other comparison;  = function with statistical differences but conflicting between the two comparisons.
