# Supplementary material for: Comparative Metagenomic and Metatranscriptomic Analysis of Hindgut Paunch Microbiota in Wood- and Dung-Feeding Higher Termites
Source: PubMed Central journal article supplement (PMC3625147; doi:10.1371/journal.pone.0061126), 2013-04-12
Supplement: pone.0061126.s013.pdf [file pone.0061126.s013.pdf]

**Table S5. Major functions differentially expressed between *A. wheeleri* and *N. corniger* metatranscriptomes<sup>a</sup>**

| Function ID                                                | Function description                                                      | Expression level |            | <i>A. wheeleri</i> vs. <i>Lab N. corniger</i> |                 |             |
|------------------------------------------------------------|---------------------------------------------------------------------------|------------------|------------|-----------------------------------------------|-----------------|-------------|
|                                                            |                                                                           | Ami              | Lab Nas    | Z-LOR                                         | p-value         | Significant |
| <b>Glycoside hydrolases in plant cell wall degradation</b> |                                                                           |                  |            |                                               |                 |             |
| pfam01055                                                  | Glyco_hydro_31: Oligosaccharide degrading                                 | 17               | 0          | 2.53                                          | 1.14E-02        | Yes         |
| pfam00933                                                  | Glyco_hydro_3: Oligosaccharide degrading                                  | 82               | 0          | 4.15                                          | 3.30E-05        | Yes         |
| pfam01270                                                  | Glyco_hydro_8: Hemicellulase                                              | 0                | 36         | -3.76                                         | 1.67E-04        | Yes         |
| pfam07745                                                  | Glyco_hydro_53: Hemicellulase                                             | 18               | 2          | 2.64                                          | 8.34E-03        | Yes         |
| pfam00331                                                  | Glyco_hydro_10: Hemicellulase                                             | 90               | 8          | 5.94                                          | 2.91E-09        | Yes         |
| pfam00457                                                  | Glyco_hydro_11: Hemicellulase                                             | 1013             | 70         | 19.87                                         | 7.72E-88        | Yes         |
| pfam00150                                                  | Cellulase, GH5: Cellulase                                                 | 132              | 519        | -16.48                                        | 4.85E-61        | Yes         |
| pfam02015                                                  | Glyco_hydro_45: Cellulase                                                 | 27               | 4          | 3.13                                          | 1.73E-03        | Yes         |
| COG3534                                                    | Alpha-L-arabinofuranosidase: Debranching                                  | 58               | 70         | -2.84                                         | 4.54E-03        | Yes         |
| <b>Cohesin and dockerin</b>                                |                                                                           |                  |            |                                               |                 |             |
| pfam09603                                                  | Fib_succ_major, corresponding to TIGR02145                                | 100              | 574        | -18.34                                        | 4.13E-75        | Yes         |
| <b>Nitrogen fixation</b>                                   |                                                                           |                  |            |                                               |                 |             |
| COG2710                                                    | Nitrogenase molybdenum-iron protein, alpha and beta chains                | 13               | 183        | -10.33                                        | 5.42E-25        | Yes         |
| COG0347                                                    | Nitrogen regulatory protein PII                                           | 2                | 139        | -6.40                                         | 1.52E-10        | Yes         |
| COG1348                                                    | Nitrogenase subunit NifH (ATPase)                                         | 2                | 87         | -5.72                                         | 1.07E-08        | Yes         |
| COG5000                                                    | Signal transduction histidine kinase in N2 fixation/metabolism regulation | 0                | 20         | -3.23                                         | 1.23E-03        | Yes         |
|                                                            | <b>Sum of all COGs involved</b>                                           | <b>17</b>        | <b>429</b> | <b>-14.46</b>                                 | <b>2.24E-47</b> | <b>Yes</b>  |
| <b>Amino acid transport</b>                                |                                                                           |                  |            |                                               |                 |             |
| COG0601                                                    | ABC-type dipeptide/oligopeptide/nickel transport, permease components     | 47               | 133        | -8.00                                         | 1.26E-15        | Yes         |
| COG0834                                                    | ABC-type amino acid transport/signal transduction, periplasmic component  | 27               | 51         | -4.00                                         | 6.34E-05        | Yes         |
| COG1176                                                    | ABC-type spermidine/putrescine transport, permease component I            | 0                | 25         | -3.47                                         | 5.28E-04        | Yes         |
| COG0591                                                    | Na+/proline symporter                                                     | 3                | 11         | -2.48                                         | 1.32E-02        | Yes         |
| COG4177                                                    | ABC-type branched-chain amino acid transport, permease component          | 20               | 1          | 2.62                                          | 8.90E-03        | Yes         |
| COG0559                                                    | Branched-chain amino acid ABC-type transport, permease components         | 26               | 4          | 2.90                                          | 3.75E-03        | Yes         |
| COG0411                                                    | ABC-type branched-chain amino acid transport, ATPase component            | 35               | 0          | 3.20                                          | 1.40E-03        | Yes         |
| COG0444                                                    | ABC-type dipeptide/oligopeptide/nickel transport, ATPase component        | 99               | 37         | 3.47                                          | 5.15E-04        | Yes         |
| COG3842                                                    | ABC-type spermidine/putrescine transport, ATPase components               | 70               | 17         | 4.07                                          | 4.72E-05        | Yes         |
| COG1115                                                    | Na+/alanine symporter                                                     | 68               | 3          | 4.76                                          | 1.97E-06        | Yes         |
| COG4608                                                    | ABC-type oligopeptide transport, ATPase component                         | 87               | 3          | 5.20                                          | 2.00E-07        | Yes         |
| COG0683                                                    | ABC-type branched-chain amino acid transport, periplasmic component       | 199              | 46         | 7.03                                          | 2.01E-12        | Yes         |
| COG4166                                                    | ABC-type oligopeptide transport, periplasmic component                    | 354              | 116        | 7.50                                          | 6.44E-14        | Yes         |

| Function ID | Function description                                | Expression level |            | <i>A. wheeleri</i> vs. <i>Lab N. corniger</i> |                 |             |
|-------------|-----------------------------------------------------|------------------|------------|-----------------------------------------------|-----------------|-------------|
|             |                                                     | Ami              | Lab Nas    | Z-LOR                                         | p-value         | Significant |
| COG0747     | ABC-type dipeptide transport, periplasmic component | 884              | 247        | 13.42                                         | 4.82E-41        | Yes         |
|             | <b>Sum of all COGs involved</b>                     | <b>2020</b>      | <b>758</b> | <b>15.33</b>                                  | <b>4.51E-53</b> | <b>Yes</b>  |

#### Amino acid and amine oxidation

|           |                                       |     |    |       |          |     |
|-----------|---------------------------------------|-----|----|-------|----------|-----|
| COG0753   | Catalase                              | 34  | 0  | 3.17  | 1.55E-03 | Yes |
| COG3546   | Mn-containing catalase                | 59  | 0  | 3.73  | 1.90E-04 | Yes |
| COG2414   | Aldehyde:ferredoxin oxidoreductase    | 148 | 27 | 6.63  | 3.38E-11 | Yes |
| pfam07833 | Cu_amine_oxidN1, copper amine oxidase | 724 | 17 | 14.40 | 5.38E-47 | Yes |

#### Ammonia transport and assimilation

|         |                                         |           |            |               |                 |            |
|---------|-----------------------------------------|-----------|------------|---------------|-----------------|------------|
| COG0004 | Ammonia permease                        | 13        | 133        | -9.10         | 9.32E-20        | Yes        |
| COG3968 | Protein related to glutamine synthetase | 20        | 124        | -8.89         | 6.14E-19        | Yes        |
| COG0069 | Glutamate synthase domain 2             | 6         | 75         | -6.70         | 2.08E-11        | Yes        |
|         | <b>Sum of all COGs involved</b>         | <b>69</b> | <b>354</b> | <b>-15.03</b> | <b>4.62E-51</b> | <b>Yes</b> |

#### Amino acid biosynthesis

##### Arginine biosynthesis

|         |                                                              |            |           |             |                 |            |
|---------|--------------------------------------------------------------|------------|-----------|-------------|-----------------|------------|
| COG0458 | Carbamoylphosphate synthase large subunit (split gene in MJ) | 46         | 16        | 2.55        | 1.07E-02        | Yes        |
| COG0548 | Acetylglutamate kinase                                       | 27         | 2         | 3.12        | 1.80E-03        | Yes        |
|         | <b>Sum of all COGs involved</b>                              | <b>192</b> | <b>70</b> | <b>4.82</b> | <b>1.45E-06</b> | <b>Yes</b> |

##### Isoleucine biosynthesis

|         |                                                   |            |            |              |                 |            |
|---------|---------------------------------------------------|------------|------------|--------------|-----------------|------------|
| COG0059 | Ketol-acid reductoisomerase                       | 46         | 122        | -7.47        | 8.11E-14        | Yes        |
| COG0440 | Acetolactate synthase, small (regulatory) subunit | 8          | 30         | -4.12        | 3.86E-05        | Yes        |
| COG0028 | Thiamine pyrophosphate-requiring enzymes          | 105        | 50         | 2.48         | 1.30E-02        | Yes        |
|         | <b>Sum of all COGs involved</b>                   | <b>197</b> | <b>233</b> | <b>-5.23</b> | <b>1.68E-07</b> | <b>Yes</b> |

##### Leucine biosynthesis

|         |                                                   |            |            |              |                 |            |
|---------|---------------------------------------------------|------------|------------|--------------|-----------------|------------|
| COG0059 | Ketol-acid reductoisomerase                       | 46         | 122        | -7.47        | 8.11E-14        | Yes        |
| COG0440 | Acetolactate synthase, small (regulatory) subunit | 8          | 30         | -4.12        | 3.86E-05        | Yes        |
| COG0028 | Thiamine pyrophosphate-requiring enzymes          | 105        | 50         | 2.48         | 1.30E-02        | Yes        |
|         | <b>Sum of all COGs involved</b>                   | <b>299</b> | <b>320</b> | <b>-5.05</b> | <b>4.31E-07</b> | <b>Yes</b> |

##### Valine biosynthesis

|         |                                                   |            |            |              |                 |            |
|---------|---------------------------------------------------|------------|------------|--------------|-----------------|------------|
| COG0059 | Ketol-acid reductoisomerase                       | 46         | 122        | -7.47        | 8.11E-14        | Yes        |
| COG0440 | Acetolactate synthase, small (regulatory) subunit | 8          | 30         | -4.12        | 3.86E-05        | Yes        |
| COG0028 | Thiamine pyrophosphate-requiring enzymes          | 105        | 50         | 2.48         | 1.30E-02        | Yes        |
|         | <b>Sum of all COGs involved</b>                   | <b>226</b> | <b>261</b> | <b>-5.31</b> | <b>1.09E-07</b> | <b>Yes</b> |

| Function ID                           | Function description                                                   | Expression level |             | <i>A. wheeleri</i> vs. <i>Lab N. corniger</i> |                 |             |
|---------------------------------------|------------------------------------------------------------------------|------------------|-------------|-----------------------------------------------|-----------------|-------------|
|                                       |                                                                        | Ami              | Lab Nas     | Z-LOR                                         | p-value         | Significant |
| <b>Vitamin biosynthesis</b>           |                                                                        |                  |             |                                               |                 |             |
| <b>Thiamine biosynthesis</b>          |                                                                        |                  |             |                                               |                 |             |
| COG0422                               | Thiamine biosynthesis protein ThiC                                     | 4                | 17          | -3.17                                         | 1.51E-03        | Yes         |
| COG0352                               | Thiamine monophosphate synthase                                        | 5                | 14          | -2.58                                         | 9.82E-03        | Yes         |
| <b>Sum of all COGs involved</b>       |                                                                        | <b>34</b>        | <b>55</b>   | <b>-3.75</b>                                  | <b>1.75E-04</b> | <b>Yes</b>  |
| <b>Inorganic phosphate metabolism</b> |                                                                        |                  |             |                                               |                 |             |
| COG0226                               | ABC-type phosphate transport system, periplasmic component             | 211              | 344         | -9.23                                         | 2.78E-20        | Yes         |
| COG0581                               | ABC-type phosphate transport system, permease component                | 7                | 175         | -9.18                                         | 4.33E-20        | Yes         |
| COG0704                               | Phosphate uptake regulator                                             | 5                | 219         | -9.07                                         | 1.24E-19        | Yes         |
| COG1785                               | Alkaline phosphatase                                                   | 56               | 155         | -8.56                                         | 1.09E-17        | Yes         |
| COG1117                               | ABC-type phosphate transport system, ATPase component                  | 21               | 86          | -7.09                                         | 1.31E-12        | Yes         |
| COG0855                               | Polyphosphate kinase                                                   | 0                | 65          | -4.46                                         | 8.30E-06        | Yes         |
| COG0248                               | Exopolyphosphatase                                                     | 3                | 25          | -3.99                                         | 6.69E-05        | Yes         |
| COG0573                               | ABC-type phosphate transport system, permease component                | 50               | 66          | -3.17                                         | 1.55E-03        | Yes         |
| COG1283                               | Na <sup>+</sup> /phosphate symporter                                   | 26               | 5           | 2.73                                          | 6.32E-03        | Yes         |
| <b>Sugar transporter</b>              |                                                                        |                  |             |                                               |                 |             |
| COG1653                               | ABC-type sugar transport system, periplasmic component                 | 711              | 733         | -6.63                                         | 3.47E-11        | Yes         |
| COG0395                               | ABC-type sugar transport system, permease component                    | 59               | 122         | -6.58                                         | 4.77E-11        | Yes         |
| COG4214                               | ABC-type xylose transport system, permease component                   | 22               | 39          | -3.33                                         | 8.63E-04        | Yes         |
| COG4211                               | ABC-type glucose/galactose transport system, permease component        | 25               | 0           | 2.85                                          | 4.41E-03        | Yes         |
| COG1593                               | TRAP-type C4-dicarboxylate transport system, large permease component  | 27               | 1           | 2.93                                          | 3.42E-03        | Yes         |
| COG3839                               | ABC-type sugar transport systems, ATPase components                    | 433              | 246         | 3.14                                          | 1.68E-03        | Yes         |
| COG1172                               | Ribose/xylose/arabinose/galactoside ABC transport, permease components | 63               | 2           | 4.37                                          | 1.27E-05        | Yes         |
| COG1638                               | TRAP-type C4-dicarboxylate transport system, periplasmic component     | 223              | 1           | 5.08                                          | 3.69E-07        | Yes         |
| COG1129                               | ABC-type sugar transport system, ATPase component                      | 187              | 21          | 8.14                                          | 3.98E-16        | Yes         |
| COG1879                               | ABC-type sugar transport system, periplasmic component                 | 671              | 18          | 13.87                                         | 9.15E-44        | Yes         |
| <b>Glycolysis</b>                     |                                                                        |                  |             |                                               |                 |             |
| COG0057                               | Glyceraldehyde-3-phosphate dehydrogenase                               | 487              | 482         | -4.78                                         | 1.79E-06        | Yes         |
| COG0149                               | Triosephosphate isomerase                                              | 67               | 94          | -4.09                                         | 4.22E-05        | Yes         |
| COG0191                               | Fructose/tagatose bisphosphate aldolase                                | 112              | 118         | -2.79                                         | 5.26E-03        | Yes         |
| COG0166                               | Glucose-6-phosphate isomerase                                          | 34               | 4           | 3.45                                          | 5.56E-04        | Yes         |
| <b>Sum of all COGs involved</b>       |                                                                        | <b>1234</b>      | <b>1073</b> | <b>-4.79</b>                                  | <b>1.65E-06</b> | <b>Yes</b>  |
| <b>Pentose phosphate pathway</b>      |                                                                        |                  |             |                                               |                 |             |
| COG0176                               | Transaldolase                                                          | 18               | 0           | 2.51                                          | 1.22E-02        | Yes         |

| Function ID | Function description                                                  | Expression level |           | <i>A. wheeleri</i> vs. <i>Lab N. corniger</i> |                 |             |
|-------------|-----------------------------------------------------------------------|------------------|-----------|-----------------------------------------------|-----------------|-------------|
|             |                                                                       | Ami              | Lab Nas   | Z-LOR                                         | p-value         | Significant |
| COG0235     | Ribulose-5-phosphate 4-epimerase and related epimerases and aldolases | 40               | 0         | 3.33                                          | 8.60E-04        | Yes         |
| COG0362     | 6-phosphogluconate dehydrogenase                                      | 71               | 1         | 3.92                                          | 8.82E-05        | Yes         |
|             | <b>Sum of all COGs involved</b>                                       | <b>206</b>       | <b>21</b> | <b>8.51</b>                                   | <b>1.79E-17</b> | <b>Yes</b>  |

#### Pyruvate decarboxylation

|         |                                                   |             |            |             |                 |            |
|---------|---------------------------------------------------|-------------|------------|-------------|-----------------|------------|
| COG0674 | Pyruvate:ferredoxin oxidoreductase, alpha subunit | 448         | 250        | 3.41        | 6.61E-04        | Yes        |
| COG1013 | Pyruvate:ferredoxin oxidoreductase, beta subunit  | 402         | 150        | 7.03        | 2.11E-12        | Yes        |
|         | <b>Sum of all COGs involved</b>                   | <b>1056</b> | <b>536</b> | <b>6.48</b> | <b>8.94E-11</b> | <b>Yes</b> |

#### Homoacetogenesis

|         |                                                                              |             |             |             |                 |            |
|---------|------------------------------------------------------------------------------|-------------|-------------|-------------|-----------------|------------|
| COG0685 | 5,10-methylenetetrahydrofolate reductase                                     | 27          | 78          | -6.17       | 6.91E-10        | Yes        |
| COG2069 | CO dehydrogenase/acetyl-CoA synthase delta subunit (corrinoide Fe-S protein) | 57          | 69          | -2.83       | 4.62E-03        | Yes        |
| COG1882 | Pyruvate-formate lyase                                                       | 26          | 0           | 2.89        | 3.88E-03        | Yes        |
| COG0243 | Anaerobic dehydrogenases, typically selenocysteine-containing                | 56          | 3           | 4.41        | 1.05E-05        | Yes        |
| COG3383 | Uncharacterized anaerobic dehydrogenase                                      | 205         | 57          | 6.45        | 1.12E-10        | Yes        |
| COG2759 | Formyltetrahydrofolate synthetase                                            | 657         | 352         | 4.70        | 2.65E-06        | Yes        |
| COG0190 | 5,10-methylene-THF dehydrogenase/Methenyl THF cyclohydrolase                 | 106         | 24          | 5.18        | 2.23E-07        | Yes        |
| COG1152 | CO dehydrogenase/acetyl-CoA synthase alpha subunit                           | 39          | 7           | 3.42        | 6.34E-04        | Yes        |
| COG1456 | CO dehydrogenase/acetyl-CoA synthase gamma subunit (corrinoide Fe-S protein) | 102         | 34          | 3.96        | 7.58E-05        | Yes        |
| COG1614 | CO dehydrogenase/acetyl-CoA synthase beta subunit                            | 319         | 141         | 4.97        | 6.85E-07        | Yes        |
|         | <b>Sum of all COGs involved</b>                                              | <b>1876</b> | <b>1014</b> | <b>7.25</b> | <b>4.24E-13</b> | <b>Yes</b> |

#### Cell motility

##### Chemotaxis

|         |                                                            |            |             |               |                  |            |
|---------|------------------------------------------------------------|------------|-------------|---------------|------------------|------------|
| COG0840 | Methyl-accepting chemotaxis protein                        | 111        | 1300        | -28.33        | 1.58E-176        | Yes        |
| COG1352 | Methylase of chemotaxis methyl-accepting proteins          | 31         | 131         | -8.80         | 1.31E-18         | Yes        |
| COG1871 | Chemotaxis protein; stimulates methylation of MCP proteins | 30         | 91          | -6.77         | 1.25E-11         | Yes        |
| COG2201 | Chemotaxis response regulator                              | 102        | 173         | -6.77         | 1.29E-11         | Yes        |
| COG1776 | Chemotaxis protein CheC, inhibitor of MCP methylation      | 33         | 0           | 3.13          | 1.72E-03         | Yes        |
|         | <b>Sum of all COGs involved</b>                            | <b>605</b> | <b>1906</b> | <b>-32.33</b> | <b>2.28E-229</b> | <b>Yes</b> |

#### Flagellum structure and biogenesis

|         |                                                               |     |     |       |          |     |
|---------|---------------------------------------------------------------|-----|-----|-------|----------|-----|
| COG1677 | Flagellar hook-basal body protein                             | 9   | 72  | -6.78 | 1.22E-11 | Yes |
| COG1334 | Uncharacterized flagellar protein FlaG                        | 103 | 169 | -6.50 | 8.28E-11 | Yes |
| COG1345 | Flagellar capping protein                                     | 52  | 112 | -6.46 | 1.06E-10 | Yes |
| COG1766 | Flagellar biosynthesis/type III secretory pathway lipoprotein | 13  | 55  | -5.70 | 1.18E-08 | Yes |
| COG1360 | Flagellar motor protein                                       | 18  | 60  | -5.66 | 1.54E-08 | Yes |
| COG1886 | Flagellar motor switch/type III secretory pathway protein     | 23  | 62  | -5.36 | 8.47E-08 | Yes |

| Function ID                     | Function description                                            | Expression level |             | <i>A. wheeleri</i> vs. <i>Lab N. corniger</i> |                 |             |
|---------------------------------|-----------------------------------------------------------------|------------------|-------------|-----------------------------------------------|-----------------|-------------|
|                                 |                                                                 | Ami              | Lab Nas     | Z-LOR                                         | p-value         | Significant |
| COG1843                         | Flagellar hook capping protein                                  | 63               | 82          | -3.46                                         | 5.41E-04        | Yes         |
| COG1317                         | Flagellar biosynthesis/type III secretory pathway protein       | 4                | 19          | -3.41                                         | 6.58E-04        | Yes         |
| COG1815                         | Flagellar basal body protein                                    | 13               | 25          | -2.84                                         | 4.57E-03        | Yes         |
| COG2747                         | Negative regulator of flagellin synthesis (anti-sigma28 factor) | 18               | 0           | 2.51                                          | 1.22E-02        | Yes         |
| COG1157                         | Flagellar biosynthesis/type III secretory pathway ATPase        | 56               | 14          | 3.58                                          | 3.37E-04        | Yes         |
| COG1558                         | Flagellar basal body rod protein                                | 42               | 4           | 3.89                                          | 9.96E-05        | Yes         |
| COG4786                         | Flagellar basal body rod protein                                | 148              | 38          | 5.75                                          | 9.07E-09        | Yes         |
| COG1344                         | Flagellin and related hook-associated proteins                  | 9847             | 5433        | 18.07                                         | 5.94E-73        | Yes         |
| <b>Sum of all COGs involved</b> |                                                                 | <b>10772</b>     | <b>6402</b> | <b>12.88</b>                                  | <b>5.57E-38</b> | <b>Yes</b>  |

### Pilus

|         |                                                                                |    |    |       |          |     |
|---------|--------------------------------------------------------------------------------|----|----|-------|----------|-----|
| COG3063 | Tfp pilus assembly protein PilF                                                | 2  | 71 | -5.42 | 5.93E-08 | Yes |
| COG4966 | Tfp pilus assembly protein PilW                                                | 0  | 58 | -4.34 | 1.42E-05 | Yes |
| COG2804 | Type II secretory pathway, ATPase Pule/Tfp pilus assembly pathway, ATPase PilB | 64 | 87 | -3.78 | 1.55E-04 | Yes |
| COG2805 | Tfp pilus assembly protein, pilus retraction ATPase PilT                       | 96 | 39 | 3.08  | 2.04E-03 | Yes |
| COG4970 | Tfp pilus assembly protein FimT                                                | 68 | 0  | 3.88  | 1.06E-04 | Yes |
| COG4968 | Tfp pilus assembly protein PilE                                                | 93 | 19 | 5.06  | 4.24E-07 | Yes |

### Defense

|         |                                                                                           |    |     |       |          |     |
|---------|-------------------------------------------------------------------------------------------|----|-----|-------|----------|-----|
| COG1131 | ABC-type multidrug transport system, ATPase component                                     | 48 | 77  | -4.29 | 1.80E-05 | Yes |
| COG0841 | Cation/multidrug efflux pump                                                              | 90 | 110 | -3.64 | 2.77E-04 | Yes |
| COG1968 | Uncharacterized bacitracin resistance protein                                             | 3  | 18  | -3.38 | 7.26E-04 | Yes |
| COG0534 | Na <sup>+</sup> -driven multidrug efflux pump                                             | 1  | 10  | -2.50 | 1.25E-02 | Yes |
| COG1132 | ABC-type multidrug transport system, ATPase and permease components                       | 18 | 2   | 2.52  | 1.16E-02 | Yes |
| COG2274 | ABC-type bacteriocin/lantibiotic exporters, contain an N-terminal double-glycine peptidas | 21 | 0   | 2.67  | 7.66E-03 | Yes |
| COG1136 | ABC-type antimicrobial peptide transport system, ATPase component                         | 81 | 34  | 2.71  | 6.82E-03 | Yes |

### Sporulation

|                                  |                                                          |            |            |             |                 |            |
|----------------------------------|----------------------------------------------------------|------------|------------|-------------|-----------------|------------|
| pfam04026                        | SpoVG : SpoVG                                            | 61         | 116        | -5.53       | 3.17E-08        | Yes        |
| pfam07228                        | SpoIIE : Stage II sporulation protein E (SpoIIE)         | 1          | 14         | -2.77       | 5.55E-03        | Yes        |
| pfam07451                        | SpoVAD : Stage V sporulation protein AD (SpoVAD)         | 19         | 0          | 2.64        | 8.18E-03        | Yes        |
| pfam04232                        | SpoVS : Stage V sporulation protein S (SpoVS)            | 47         | 0          | 3.58        | 3.41E-04        | Yes        |
| pfam12116                        | SpoIID : Stage III sporulation protein D                 | 72         | 0          | 4.02        | 5.85E-05        | Yes        |
| pfam09547                        | Spore_IV_A : Stage IV sporulation protein A (spore_IV_A) | 149        | 0          | 4.76        | 1.94E-06        | Yes        |
| <b>Sum of all pfams involved</b> |                                                          | <b>421</b> | <b>151</b> | <b>8.20</b> | <b>2.33E-16</b> | <b>Yes</b> |

<sup>a</sup>See Table S4 footnotes for explanation. Colors in this table indicate:  = function with a statistically higher expression in *A. wheeleri*;  = function with a statistically higher expression in laboratory *N. corniger*.
