# Supplementary material for: Comparative Metagenomic and Metatranscriptomic Analysis of Hindgut Paunch Microbiota in Wood- and Dung-Feeding Higher Termites
Source: PubMed Central journal article supplement (PMC3625147; doi:10.1371/journal.pone.0061126), 2013-04-12
Supplement: pone.0061126.s014.pdf [file pone.0061126.s014.pdf]

**Table S6. Glycoside hydrolase (GH) abundance in metagenomes**

| GH ID | Pfam HMM Name             | Pfam Accession | Gene Count <sup>a</sup>          |                                    | Estimated gene copy <sup>b</sup> |                                    |
|-------|---------------------------|----------------|----------------------------------|------------------------------------|----------------------------------|------------------------------------|
|       |                           |                | <i>A. wheeleri</i><br>(cow dung) | <i>N. corniger</i><br>(lab colony) | <i>A. wheeleri</i><br>(cow dung) | <i>N. corniger</i><br>(lab colony) |
| GH1   | Glyco_hydro_1             | PF00232        | 36                               | 39                                 | 70                               | 62                                 |
| GH2   | Glyco_hydro_2             | PF00703        | 56                               | 20                                 | 95                               | 37                                 |
|       | Glyco_hydro_2_C           | PF02836        | 96                               | 39                                 | 154                              | 56                                 |
|       | Glyco_hydro_2_N           | PF02837        | 88                               | 28                                 | 142                              | 48                                 |
| GH3   | Glyco_hydro_3             | PF00933        | 148                              | 121                                | 268                              | 205                                |
|       | Glyco_hydro_3_C           | PF01915        | 100                              | 48                                 | 165                              | 94                                 |
| GH4   | Glyco_hydro_4             | PF02056        | 71                               | 28                                 | 106                              | 40                                 |
|       | Glyco_hydro_4C            | PF11975        | 59                               | 21                                 | 92                               | 48                                 |
| GH5   | Cellulase                 | PF00150        | 149                              | 197                                | 258                              | 341                                |
| GH6   | Glyco_hydro_6             | PF01341        | 0                                | 0                                  | 0                                | 0                                  |
| GH7   | Glyco_hydro_7             | PF00840        | 0                                | 0                                  | 0                                | 0                                  |
| GH8   | Glyco_hydro_8             | PF01270        | 21                               | 37                                 | 37                               | 80                                 |
| GH9   | Glyco_hydro_9             | PF00759        | 63                               | 68                                 | 104                              | 138                                |
| GH10  | Glyco_hydro_10            | PF00331        | 141                              | 126                                | 225                              | 208                                |
| GH11  | Glyco_hydro_11            | PF00457        | 50                               | 52                                 | 110                              | 94                                 |
| GH12  | Glyco_hydro_12            | PF01670        | 0                                | 0                                  | 0                                | 0                                  |
| GH13  | Alpha-amylase             | PF00128        | 197                              | 134                                | 365                              | 244                                |
| GH14  | Glyco_hydro_14            | PF01373        | 1                                | 0                                  | 2                                | 0                                  |
| GH15  | Glyco_hydro_15            | PF00723        | 2                                | 0                                  | 4                                | 0                                  |
| GH16  | Glyco_hydro_16            | PF00722        | 10                               | 7                                  | 18                               | 9                                  |
| GH17  | Glyco_hydro_17            | PF00332        | 0                                | 0                                  | 0                                | 0                                  |
| GH18  | Glyco_hydro_18            | PF00704        | 30                               | 32                                 | 47                               | 53                                 |
| GH19  | Glyco_hydro_19            | PF00182        | 0                                | 0                                  | 0                                | 0                                  |
| GH20  | Glyco_hydro_20            | PF00728        | 31                               | 32                                 | 57                               | 51                                 |
|       | Glyco_hydro_20b           | PF02838        | 2                                | 5                                  | 6                                | 8                                  |
| GH22  | Lys                       | PF00062        | 0                                | 0                                  | 0                                | 0                                  |
| GH23  | SLT                       | PF01464        | 88                               | 68                                 | 175                              | 144                                |
| GH24  | Phage_lysozyme            | PF00959        | 3                                | 0                                  | 5                                | 0                                  |
| GH25  | Glyco_hydro_25            | PF01183        | 7                                | 1                                  | 8                                | 1                                  |
| GH26  | Glyco_hydro_26            | PF02156        | 18                               | 26                                 | 34                               | 58                                 |
| GH27  | Melibiose                 | PF02065        | 30                               | 15                                 | 51                               | 27                                 |
| GH28  | Glyco_hydro_28            | PF00295        | 13                               | 4                                  | 28                               | 4                                  |
| GH29  | Alpha_L_fucos             | PF01120        | 47                               | 26                                 | 81                               | 35                                 |
| GH30  | Glyco_hydro_30            | PF02055        | 24                               | 24                                 | 28                               | 31                                 |
| GH31  | Glyco_hydro_31            | PF01055        | 100                              | 29                                 | 167                              | 52                                 |
| GH32  | Glyco_hydro_32C           | PF08244        | 4                                | 0                                  | 5                                | 0                                  |
|       | Glyco_hydro_32N           | PF00251        | 14                               | 1                                  | 23                               | 1                                  |
| GH33  | BNR                       | PF02012        | 20                               | 5                                  | 101                              | 25                                 |
| GH34  | Neur                      | PF00064        | 0                                | 0                                  | 0                                | 0                                  |
| GH35  | Glyco_hydro_35            | PF01301        | 3                                | 1                                  | 3                                | 1                                  |
| GH36  | BLAST search <sup>c</sup> |                | 26                               | 8                                  | 43                               | 17                                 |
| GH37  | Trehalase                 | PF01204        | 15                               | 8                                  | 30                               | 20                                 |
| GH38  | Glyco_hydro_38            | PF01074        | 22                               | 11                                 | 33                               | 15                                 |
|       | Glyco_hydro_38C           | PF07748        | 17                               | 13                                 | 18                               | 18                                 |
| GH39  | Glyco_hydro_39            | PF01229        | 24                               | 15                                 | 41                               | 28                                 |
| GH42  | Glyco_hydro_42            | PF02449        | 27                               | 37                                 | 41                               | 57                                 |
|       | Glyco_hydro_42C           | PF08533        | 3                                | 6                                  | 7                                | 7                                  |

| GH ID | Pfam HMM Name   | Pfam Accession | Gene Count <sup>a</sup>          |                                    | Estimated gene copy <sup>b</sup> |                                    |
|-------|-----------------|----------------|----------------------------------|------------------------------------|----------------------------------|------------------------------------|
|       |                 |                | <i>A. wheeleri</i><br>(cow dung) | <i>N. corniger</i><br>(lab colony) | <i>A. wheeleri</i><br>(cow dung) | <i>N. corniger</i><br>(lab colony) |
|       | Glyco_hydro_42M | PF08532        | 15                               | 21                                 | 22                               | 35                                 |
| GH43  | Glyco_hydro_43  | PF04616        | 143                              | 58                                 | 252                              | 104                                |
| GH44  | BLAST search    |                | 5                                | 0                                  | 7                                | 0                                  |
| GH45  | Glyco_hydro_45  | PF02015        | 14                               | 33                                 | 20                               | 71                                 |
| GH46  | Glyco_hydro_46  | PF01374        | 0                                | 0                                  | 0                                | 0                                  |
| GH47  | Glyco_hydro_47  | PF01532        | 1                                | 0                                  | 2                                | 0                                  |
| GH48  | Glyco_hydro_48  | PF02011        | 1                                | 0                                  | 1                                | 0                                  |
| GH49  | Glyco_hydro_49  | PF03718        | 0                                | 0                                  | 0                                | 0                                  |
| GH50  | BLAST search    |                | 8                                | 0                                  | 16                               | 0                                  |
| GH51  | BLAST search    |                | 53                               | 9                                  | 102                              | 16                                 |
| GH52  | Glyco_hydro_52  | PF03512        | 0                                | 9                                  | 0                                | 22                                 |
| GH53  | Glyco_hydro_53  | PF07745        | 13                               | 35                                 | 17                               | 64                                 |
| GH54  | ArabFuran-catal | PF09206        | 1                                | 0                                  | 1                                | 0                                  |
| GH55  | BLAST search    |                | 2                                | 0                                  | 5                                | 0                                  |
| GH56  | Glyco_hydro_56  | PF01630        | 0                                | 0                                  | 0                                | 0                                  |
| GH57  | Glyco_hydro_57  | PF03065        | 43                               | 37                                 | 77                               | 88                                 |
| GH58  | BLAST search    |                | 3                                | 0                                  | 5                                | 0                                  |
| GH59  | Glyco_hydro_59  | PF02057        | 1                                | 0                                  | 1                                | 0                                  |
| GH61  | Glyco_hydro_61  | PF03443        | 0                                | 0                                  | 0                                | 0                                  |
| GH62  | Glyco_hydro_62  | PF03664        | 1                                | 0                                  | 1                                | 0                                  |
| GH63  | Glyco_hydro_63  | PF03200        | 1                                | 0                                  | 1                                | 0                                  |
| GH64  | BLAST search    |                | 0                                | 0                                  | 0                                | 0                                  |
| GH65  | Glyco_hydro_65C | PF03633        | 8                                | 1                                  | 12                               | 1                                  |
|       | Glyco_hydro_65m | PF03632        | 41                               | 3                                  | 65                               | 3                                  |
|       | Glyco_hydro_65N | PF03636        | 13                               | 2                                  | 27                               | 2                                  |
| GH66  | BLAST search    |                | 4                                | 0                                  | 4                                | 0                                  |
| GH67  | Glyco_hydro_67C | PF07477        | 19                               | 13                                 | 24                               | 21                                 |
|       | Glyco_hydro_67M | PF07488        | 24                               | 9                                  | 33                               | 18                                 |
|       | Glyco_hydro_67N | PF03648        | 5                                | 0                                  | 6                                | 0                                  |
| GH68  | Glyco_hydro_68  | PF02435        | 0                                | 0                                  | 0                                | 0                                  |
| GH70  | Glyco_hydro_70  | PF02324        | 0                                | 0                                  | 0                                | 0                                  |
| GH71  | Glyco_hydro_71  | PF03659        | 0                                | 0                                  | 0                                | 0                                  |
| GH72  | Glyco_hydro_72  | PF03198        | 0                                | 0                                  | 0                                | 0                                  |
| GH73  | Glucosaminidase | PF01832        | 29                               | 13                                 | 49                               | 19                                 |
| GH74  | BLAST search    |                | 13                               | 16                                 | 21                               | 28                                 |
| GH75  | Chitosanase     | PF07335        | 0                                | 0                                  | 0                                | 0                                  |
| GH76  | Glyco_hydro_76  | PF03663        | 5                                | 0                                  | 6                                | 0                                  |
| GH77  | Glyco_hydro_77  | PF02446        | 126                              | 58                                 | 195                              | 109                                |
| GH78  | Bac_rhamnosid   | PF05592        | 29                               | 7                                  | 48                               | 8                                  |
| GH79  | Glyco_hydro_79n | PF03662        | 0                                | 1                                  | 0                                | 1                                  |
| GH80  | BLAST search    |                | 0                                | 0                                  | 0                                | 0                                  |
| GH81  | Glyco_hydro_81  | PF03639        | 0                                | 0                                  | 0                                | 0                                  |
| GH82  | BLAST search    |                | 0                                | 0                                  | 0                                | 0                                  |
| GH83  | HN              | PF00423        | 0                                | 0                                  | 0                                | 0                                  |
| GH84  | NAGidase        | PF07555        | 0                                | 0                                  | 0                                | 0                                  |
| GH85  | Glyco_hydro_85  | PF03644        | 1                                | 0                                  | 1                                | 0                                  |
| GH86  | BLAST search    |                | 0                                | 0                                  | 0                                | 0                                  |
| GH87  | BLAST search    |                | 0                                | 0                                  | 0                                | 0                                  |
| GH88  | Glyco_hydro_88  | PF07470        | 58                               | 19                                 | 89                               | 25                                 |

| GH ID | Pfam HMM Name   | Pfam Accession | Gene Count <sup>a</sup>          |                                    | Estimated gene copy <sup>b</sup> |                                    |
|-------|-----------------|----------------|----------------------------------|------------------------------------|----------------------------------|------------------------------------|
|       |                 |                | <i>A. wheeleri</i><br>(cow dung) | <i>N. corniger</i><br>(lab colony) | <i>A. wheeleri</i><br>(cow dung) | <i>N. corniger</i><br>(lab colony) |
| GH89  | NAGLU           | PF05089        | 0                                | 2                                  | 0                                | 3                                  |
| GH90  | BLAST search    |                | 0                                | 0                                  | 0                                | 0                                  |
| GH91  | BLAST search    |                | 0                                | 0                                  | 0                                | 0                                  |
| GH92  | Glyco_hydro_92  | PF07971        | 9                                | 7                                  | 14                               | 7                                  |
| GH93  | BLAST search    |                | 0                                | 0                                  | 0                                | 0                                  |
| GH94  | BLAST search    |                | 74                               | 52                                 | 125                              | 118                                |
| GH95  | BLAST search    |                | 29                               | 11                                 | 42                               | 19                                 |
| GH96  | BLAST search    |                | 0                                | 0                                  | 0                                | 0                                  |
| GH97  | Glyco_hydro_97  | PF10566        | 5                                | 9                                  | 7                                | 14                                 |
| GH98  | Glyco_hydro_98M | PF08306        | 0                                | 0                                  | 0                                | 0                                  |
|       | Glyco_hydro_98C | PF08307        | 1                                | 0                                  | 1                                | 0                                  |
| GH99  | BLAST search    |                | 0                                | 1                                  | 0                                | 1                                  |
| GH100 | Invertase_neut  | PF04853        | 0                                | 0                                  | 0                                | 0                                  |
| GH101 | BLAST search    |                | 0                                | 0                                  | 0                                | 0                                  |
| GH102 | MltA            | PF03562        | 1                                | 2                                  | 2                                | 4                                  |
| GH103 | BLAST search    |                | 3                                | 2                                  | 5                                | 3                                  |
| GH104 | See GH24        | PF00959        |                                  |                                    |                                  |                                    |
| GH105 | See GH88        | PF07470        |                                  |                                    |                                  |                                    |
| GH106 | BLAST search    |                | 7                                | 2                                  | 10                               | 2                                  |
| GH107 | BLAST search    |                | 3                                | 0                                  | 3                                | 0                                  |
| GH108 | DUF847          | PF05838        | 6                                | 0                                  | 8                                | 0                                  |
| GH109 | BLAST search    |                | 15                               | 5                                  | 25                               | 7                                  |
| GH110 | BLAST search    |                | 0                                | 0                                  | 0                                | 0                                  |

<sup>a</sup> Gene count is the number of genes in the metagenome.

<sup>b</sup> Estimated gene copy is the count of genes weighted by their individual read depth, which should reflect individual population abundance.

<sup>c</sup> BLAST search: corresponding CAZy is not available, and the identification is through Blastp search, with an e-value cutoff of 1e-6.
