# Supplementary material for: Comparative Metagenomic and Metatranscriptomic Analysis of Hindgut Paunch Microbiota in Wood- and Dung-Feeding Higher Termites
Source: PubMed Central journal article supplement (PMC3625147; doi:10.1371/journal.pone.0061126), 2013-04-12
Supplement: pone.0061126.s015.pdf [file pone.0061126.s015.pdf]

**Table S7. Estimated average genome size in metagenomes using single-copy phylogenetic markers <sup>a</sup>**

| COG ID        | Function                                            | Consensus length of each COG (bp) | Total bases in each COG (bp) <sup>b</sup> |                    | Estimated copies of “full-length” genes in each COG <sup>c</sup> |                    | Estimated average genome size (Mbp) <sup>d</sup> |                    |
|---------------|-----------------------------------------------------|-----------------------------------|-------------------------------------------|--------------------|------------------------------------------------------------------|--------------------|--------------------------------------------------|--------------------|
|               |                                                     |                                   | A. <i>wheeleri</i>                        | N. <i>corniger</i> | A. <i>wheeleri</i>                                               | N. <i>corniger</i> | A. <i>wheeleri</i>                               | N. <i>corniger</i> |
| COG0016       | Phenylalanyl-tRNA synthetase alpha subunit          | 1005                              | 72156                                     | 42929              | 72                                                               | 43                 | 3.6                                              | 3.3                |
| COG0048       | Ribosomal protein S12                               | 387                               | 14907                                     | 12194              | 39                                                               | 32                 | 6.7                                              | 4.5                |
| COG0049       | Ribosomal protein S7                                | 444                               | 20860                                     | 14017              | 47                                                               | 32                 | 5.5                                              | 4.5                |
| COG0051       | Ribosomal protein S10                               | 312                               | 15486                                     | 9195               | 50                                                               | 29                 | 5.2                                              | 4.8                |
| COG0081       | Ribosomal protein L1                                | 684                               | 41721                                     | 21326              | 61                                                               | 31                 | 4.2                                              | 4.5                |
| COG0087       | Ribosomal protein L3                                | 654                               | 31701                                     | 15326              | 48                                                               | 23                 | 5.3                                              | 6.0                |
| COG0088       | Ribosomal protein L4                                | 642                               | 31314                                     | 22193              | 49                                                               | 35                 | 5.3                                              | 4.1                |
| COG0089       | Ribosomal protein L23                               | 282                               | 11709                                     | 8570               | 42                                                               | 30                 | 6.2                                              | 4.6                |
| COG0090       | Ribosomal protein L2                                | 825                               | 46379                                     | 20489              | 56                                                               | 25                 | 4.6                                              | 5.7                |
| COG0092       | Ribosomal protein S3                                | 699                               | 42385                                     | 24971              | 61                                                               | 36                 | 4.2                                              | 4.0                |
| COG0093       | Ribosomal protein L14                               | 366                               | 21727                                     | 15002              | 59                                                               | 41                 | 4.3                                              | 3.4                |
| COG0094       | Ribosomal protein L5                                | 540                               | 40881                                     | 19266              | 76                                                               | 36                 | 3.4                                              | 4.0                |
| COG0096       | Ribosomal protein S8                                | 396                               | 25605                                     | 8233               | 65                                                               | 21                 | 4.0                                              | 6.8                |
| COG0097       | Ribosomal protein L6P/L9E                           | 534                               | 31501                                     | 14005              | 59                                                               | 26                 | 4.3                                              | 5.4                |
| COG0098       | Ribosomal protein S5                                | 543                               | 26419                                     | 21726              | 49                                                               | 40                 | 5.3                                              | 3.5                |
| COG0099       | Ribosomal protein S13                               | 363                               | 15655                                     | 13683              | 43                                                               | 38                 | 5.9                                              | 3.7                |
| COG0100       | Ribosomal protein S11                               | 387                               | 21411                                     | 9552               | 55                                                               | 25                 | 4.6                                              | 5.7                |
| COG0102       | Ribosomal protein L13                               | 444                               | 27399                                     | 9118               | 62                                                               | 21                 | 4.2                                              | 6.9                |
| COG0150       | Phosphoribosylaminoimidazole (AIR) synthetase       | 1035                              | 60074                                     | 34455              | 58                                                               | 33                 | 4.4                                              | 4.2                |
| COG0197       | Ribosomal protein L16/L10E                          | 438                               | 24413                                     | 12272              | 56                                                               | 28                 | 4.6                                              | 5.0                |
| COG0200       | Ribosomal protein L15                               | 456                               | 23668                                     | 11238              | 52                                                               | 25                 | 4.9                                              | 5.7                |
| COG0211       | Ribosomal protein L27                               | 261                               | 12693                                     | 6237               | 49                                                               | 24                 | 5.3                                              | 5.9                |
| COG0216       | Protein chain release factor A                      | 1089                              | 67545                                     | 39011              | 62                                                               | 36                 | 4.1                                              | 3.9                |
| COG0222       | Ribosomal protein L7/L12                            | 372                               | 18070                                     | 14900              | 49                                                               | 40                 | 5.3                                              | 3.5                |
| COG0256       | Ribosomal protein L18                               | 375                               | 16164                                     | 9917               | 43                                                               | 26                 | 5.9                                              | 5.3                |
| COG0292       | Ribosomal protein L20                               | 354                               | 16018                                     | 8515               | 45                                                               | 24                 | 5.7                                              | 5.9                |
| COG0504       | CTP synthase (UTP-ammonia lyase)                    | 1599                              | 110962                                    | 68072              | 69                                                               | 43                 | 3.7                                              | 3.3                |
| COG0541       | Signal recognition particle GTPase                  | 1353                              | 65094                                     | 50637              | 48                                                               | 37                 | 5.3                                              | 3.8                |
| COG0556       | Helicase subunit of the DNA excision repair complex | 1989                              | 134297                                    | 64365              | 68                                                               | 32                 | 3.8                                              | 4.4                |
| COG0632       | Holliday junction resolvase, DNA-binding subunit    | 603                               | 34350                                     | 19688              | 57                                                               | 33                 | 4.5                                              | 4.3                |
| COG0691       | tmRNA-binding protein                               | 459                               | 22947                                     | 10636              | 50                                                               | 23                 | 5.1                                              | 6.1                |
| <b>Median</b> |                                                     |                                   |                                           |                    |                                                                  |                    | <b>4.6</b>                                       | <b>4.5</b>         |

<sup>a</sup>Single-copy phylogenetic marker genes were used to estimate average genome size in metagenomes. Using the median of results obtained from all individual phylogenetic marker COGs listed above should provide a closer estimation than results obtained using a single COG.

<sup>b</sup>Total bases in each COG was estimated by summing up the lengths of all genes in each COG, and adjusted by read depths of individual genes.

<sup>c</sup>Estimated copies of “full-length” gene = total bases in one COG / its consensus COG length

<sup>d</sup>Estimated average genome size = total bases used in metagenome assembly / estimated copies of “full-length” genes in each phylogenetic marker COG
