# Supplementary material for: Comparative Metagenomic and Metatranscriptomic Analysis of Hindgut Paunch Microbiota in Wood- and Dung-Feeding Higher Termites
Source: PLOS journal article supplement (doi:10.1371/journal.pone.0061126), 2013-04-12
Supplement: S5 (10.1371/journal.pone.0061126.s005) [file journal.pone.0061126.s005]

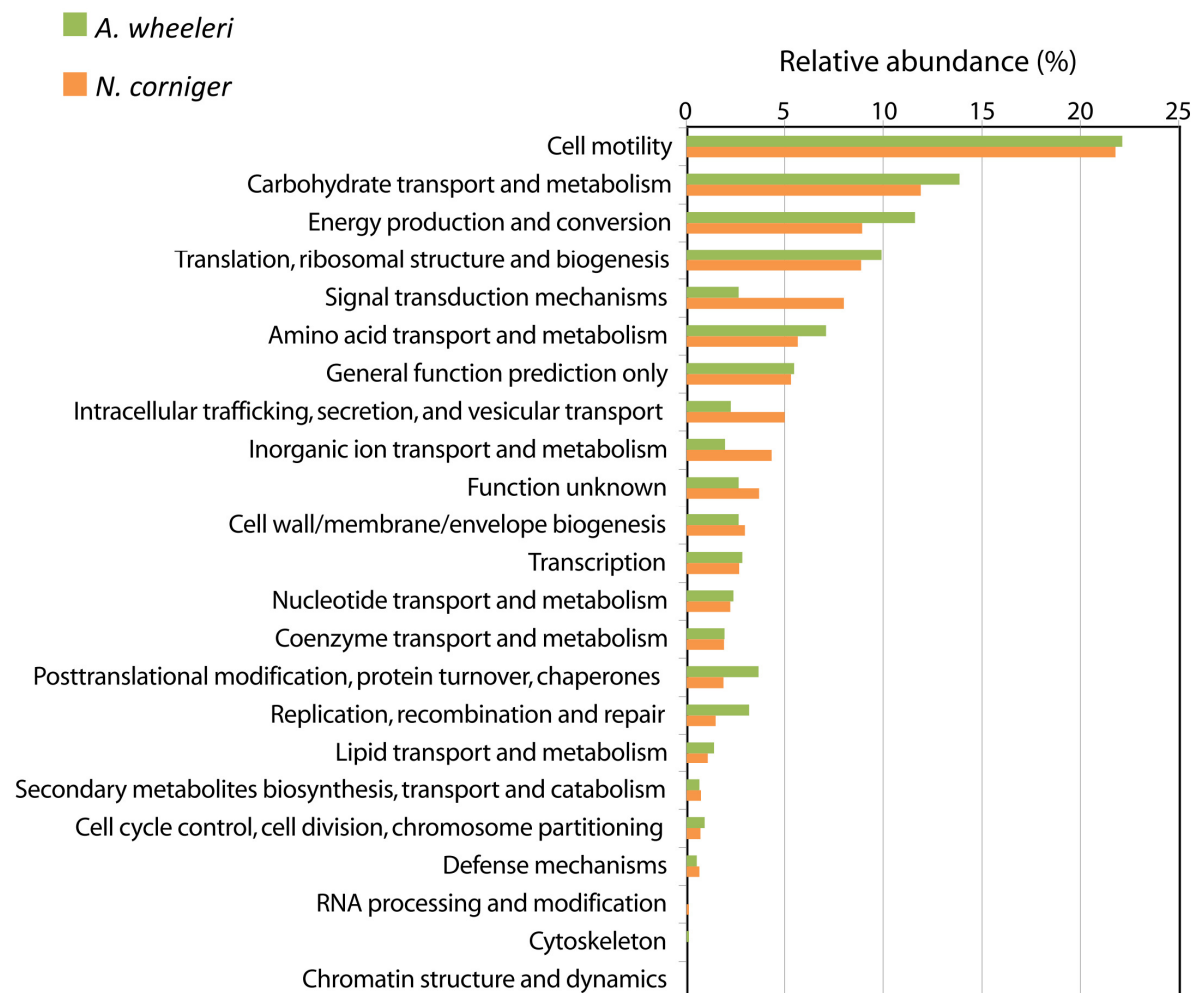

**Figure S5.** Transcript distribution among COG categories.
